# Supplementary material
Source: PubMed Central journal article supplement (PMC6684261)
Supplement: NIHMS1530297-supplement-Supp_Data_3.pdf [file NIHMS1530297-supplement-Supp_Data_3.pdf]

| day30_DEG_0.05_EvsISDown | adj.P.Val   | P.Value     | t        | B        | logFC    |
|--------------------------|-------------|-------------|----------|----------|----------|
| LOC499407                | 0.842811073 | 0.002104079 | -4.45074 | -0.32866 | -0.32095 |
| ACTL7B                   | 0.842811073 | 0.002488546 | -4.32593 | -0.37754 | -0.22596 |
| MROH7                    | 0.842811073 | 0.002674182 | -4.27294 | -0.3989  | -0.35048 |
| NUDT17                   | 0.842811073 | 0.00311701  | -4.16108 | -0.44522 | -0.26669 |
| LOC100909680             | 0.842811073 | 0.003314041 | -4.11671 | -0.46407 | -0.95086 |
| LOC499136                | 0.842811073 | 0.003576832 | -4.06175 | -0.48778 | -0.5255  |
| FASLG                    | 0.842811073 | 0.00379908  | -4.01857 | -0.50672 | -0.37407 |
| LOC689757                | 0.842811073 | 0.005214881 | -3.79473 | -0.60908 | -0.16527 |
| APOC1                    | 0.842811073 | 0.005958572 | -3.70199 | -0.65361 | -0.58026 |
| CDH7                     | 0.842811073 | 0.006280684 | -3.6656  | -0.67143 | -1.21314 |
| LOC689927                | 0.842811073 | 0.007540609 | -3.54017 | -0.73436 | -0.16723 |
| GPR21                    | 0.842811073 | 0.007934552 | -3.50549 | -0.75218 | -0.41974 |
| ZCCHC7                   | 0.842811073 | 0.00933183  | -3.39573 | -0.80975 | -0.61316 |
| SULT1B1                  | 0.842811073 | 0.010008401 | -3.34868 | -0.83498 | -0.37247 |
| CYP4F17                  | 0.842811073 | 0.010435252 | -3.32069 | -0.85014 | -0.25886 |
| ADCY8                    | 0.842811073 | 0.010819786 | -3.2965  | -0.86335 | -0.17692 |
| HOXB9                    | 0.842811073 | 0.012162547 | -3.21859 | -0.90646 | -0.79027 |
| GSG1                     | 0.842811073 | 0.012308418 | -3.21068 | -0.91089 | -0.2748  |
| GMNN                     | 0.842811073 | 0.01296469  | -3.17625 | -0.93027 | -0.48921 |
| CABYR                    | 0.842811073 | 0.013397329 | -3.15454 | -0.94258 | -0.20538 |
| SPATA21                  | 0.842811073 | 0.013431754 | -3.15285 | -0.94354 | -0.32692 |
| RNF133                   | 0.842811073 | 0.013580931 | -3.14555 | -0.9477  | -0.27279 |
| YBEY                     | 0.842811073 | 0.014028112 | -3.12417 | -0.95991 | -0.1792  |
| LOC102550396             | 0.842811073 | 0.014356843 | -3.10891 | -0.96868 | -0.34851 |
| VOM2R44                  | 0.842811073 | 0.014602071 | -3.09776 | -0.9751  | -0.21718 |
| OLR1587                  | 0.842811073 | 0.014807695 | -3.08856 | -0.98042 | -0.20456 |
| UPF3B                    | 0.842811073 | 0.014825315 | -3.08778 | -0.98087 | -0.2811  |
| UGT2B1                   | 0.842811073 | 0.015087828 | -3.07624 | -0.98755 | -0.34773 |
| LOC502176                | 0.842811073 | 0.015855975 | -3.04364 | -1.00654 | -0.33176 |
| RGD1560958               | 0.842811073 | 0.015879967 | -3.04265 | -1.00712 | -0.16975 |
| SENP8                    | 0.842811073 | 0.015928977 | -3.04063 | -1.0083  | -0.53625 |
| GPR182                   | 0.842811073 | 0.016158041 | -3.03127 | -1.01378 | -0.34876 |
| LY6G5B                   | 0.842811073 | 0.016426626 | -3.02047 | -1.02012 | -0.12746 |
| RGSL2H                   | 0.842811073 | 0.016675704 | -3.01062 | -1.02592 | -2.13098 |
| LOC100361645             | 0.842811073 | 0.017064669 | -2.99554 | -1.03483 | -0.45294 |
| NKX2-6                   | 0.842811073 | 0.017083089 | -2.99484 | -1.03524 | -0.3835  |
| METTL25                  | 0.842811073 | 0.017592495 | -2.97564 | -1.04663 | -0.75951 |
| LOC56764                 | 0.842811073 | 0.017683809 | -2.97226 | -1.04864 | -0.23933 |
| OGT                      | 0.842811073 | 0.018218291 | -2.95284 | -1.06022 | -0.39453 |
| SERPIND1                 | 0.842811073 | 0.018943802 | -2.92739 | -1.07547 | -0.20861 |
| LRRC27                   | 0.842811073 | 0.019017501 | -2.92487 | -1.07699 | -0.41876 |
| GIGYF1                   | 0.842811073 | 0.020253331 | -2.88393 | -1.10172 | -0.34598 |
| HNRNPL                   | 0.842811073 | 0.020308963 | -2.88215 | -1.10281 | -0.5441  |
| SPO11                    | 0.842811073 | 0.020783966 | -2.86714 | -1.11193 | -0.53284 |
| DCLK2                    | 0.842811073 | 0.020927543 | -2.86268 | -1.11466 | -0.89875 |
| F2                       | 0.842811073 | 0.021136517 | -2.85623 | -1.11859 | -0.23121 |

|            |             |             |          |          |          |
|------------|-------------|-------------|----------|----------|----------|
| PPP2R3B    | 0.842811073 | 0.021281953 | -2.85179 | -1.12131 | -0.30436 |
| CHEK1      | 0.842811073 | 0.021384698 | -2.84867 | -1.12322 | -0.77988 |
| CCDC62     | 0.842811073 | 0.021687803 | -2.83954 | -1.1288  | -0.57645 |
| ARG1       | 0.842811073 | 0.02172781  | -2.83835 | -1.12954 | -0.89905 |
| DLX4       | 0.842811073 | 0.021864383 | -2.83429 | -1.13203 | -0.18472 |
| MMP21      | 0.842811073 | 0.021874466 | -2.83399 | -1.13221 | -0.17388 |
| FIGNL1     | 0.842811073 | 0.021902239 | -2.83317 | -1.13271 | -0.17051 |
| B3GALT2    | 0.842811073 | 0.022348295 | -2.82012 | -1.14074 | -0.21524 |
| OXNAD1     | 0.842811073 | 0.02238297  | -2.81911 | -1.14136 | -0.82397 |
| ZPBP2      | 0.842811073 | 0.0224607   | -2.81687 | -1.14274 | -0.70935 |
| GPR63      | 0.842811073 | 0.022931338 | -2.80346 | -1.15102 | -0.58254 |
| WBSCR27    | 0.842811073 | 0.023211222 | -2.79561 | -1.15587 | -0.58197 |
| KLF1       | 0.842811073 | 0.023921457 | -2.77614 | -1.16794 | -0.20003 |
| KMO        | 0.842811073 | 0.024106377 | -2.77116 | -1.17103 | -0.27918 |
| TEDDM1     | 0.842811073 | 0.024156509 | -2.76982 | -1.17187 | -2.23043 |
| PGGT1B     | 0.842811073 | 0.024498826 | -2.76074 | -1.17753 | -0.32628 |
| TSPY1      | 0.842811073 | 0.024701631 | -2.75542 | -1.18084 | -0.16036 |
| PTTG1      | 0.842811073 | 0.02532173  | -2.73942 | -1.19084 | -0.33808 |
| ULK3       | 0.842811073 | 0.025328897 | -2.73924 | -1.19096 | -0.2871  |
| PNLDC1     | 0.842811073 | 0.026117625 | -2.71948 | -1.20335 | -0.16215 |
| PRPF4B     | 0.842811073 | 0.026405188 | -2.71242 | -1.20779 | -0.50663 |
| RGD1564124 | 0.842811073 | 0.026573721 | -2.70832 | -1.21037 | -0.5927  |
| NUDT1      | 0.842811073 | 0.026750256 | -2.70406 | -1.21306 | -0.59947 |
| UNC5C      | 0.842811073 | 0.026845098 | -2.70178 | -1.21449 | -0.57313 |
| LOC499602  | 0.842811073 | 0.027375594 | -2.68919 | -1.22245 | -0.32808 |
| MAPK11     | 0.842811073 | 0.027467984 | -2.68702 | -1.22382 | -0.48478 |
| METTL4     | 0.842811073 | 0.027575419 | -2.68451 | -1.22541 | -0.21835 |
| ACTL7A     | 0.842811073 | 0.02761867  | -2.6835  | -1.22605 | -0.20611 |
| UNC13C     | 0.842811073 | 0.028530031 | -2.66262 | -1.23929 | -1.15128 |
| DDX17      | 0.842811073 | 0.028693667 | -2.65894 | -1.24163 | -0.80858 |
| ADAL       | 0.842811073 | 0.028779801 | -2.65702 | -1.24285 | -0.38148 |
| SCN1A      | 0.842811073 | 0.028961902 | -2.65296 | -1.24543 | -1.12936 |
| IL3RA      | 0.842811073 | 0.029307297 | -2.64535 | -1.25028 | -0.58131 |
| SHPRH      | 0.842811073 | 0.029663537 | -2.63758 | -1.25523 | -0.32038 |
| CAPZA3     | 0.842811073 | 0.029887164 | -2.63276 | -1.25832 | -0.61615 |
| CDCA7      | 0.842811073 | 0.030327669 | -2.62337 | -1.26432 | -0.28909 |
| CDC25C     | 0.842811073 | 0.030717084 | -2.61518 | -1.26957 | -0.34956 |
| STAP1      | 0.842811073 | 0.031024151 | -2.60879 | -1.27366 | -0.76025 |
| APITD1     | 0.842811073 | 0.031058459 | -2.60808 | -1.27412 | -0.57925 |
| CCNL2      | 0.842811073 | 0.031396866 | -2.60113 | -1.27858 | -0.5546  |
| TIA1       | 0.842811073 | 0.031580123 | -2.5974  | -1.28098 | -0.67635 |
| CELA3B     | 0.842811073 | 0.032146439 | -2.586   | -1.28832 | -0.12281 |
| CD226      | 0.842811073 | 0.032324045 | -2.58246 | -1.2906  | -0.44642 |
| TXLNG      | 0.842811073 | 0.032405068 | -2.58086 | -1.29163 | -0.21603 |
| REC8       | 0.842811073 | 0.032565411 | -2.57769 | -1.29368 | -0.15378 |
| CCDC77     | 0.842811073 | 0.032897623 | -2.57119 | -1.29788 | -0.3836  |
| ALDH1A7    | 0.842811073 | 0.033347872 | -2.56248 | -1.30351 | -0.55398 |

|            |             |             |          |          |          |
|------------|-------------|-------------|----------|----------|----------|
| CRB1       | 0.842811073 | 0.033417317 | -2.56114 | -1.30437 | -1.14231 |
| TK1        | 0.842811073 | 0.033494185 | -2.55967 | -1.30532 | -0.34545 |
| MELK       | 0.842811073 | 0.033856068 | -2.55278 | -1.30978 | -0.25564 |
| ESM1       | 0.842811073 | 0.033939821 | -2.5512  | -1.31081 | -0.4991  |
| NODAL      | 0.842811073 | 0.034007246 | -2.54993 | -1.31163 | -0.13063 |
| LRRC29     | 0.842811073 | 0.034154363 | -2.54716 | -1.31342 | -0.36887 |
| B3GNTL1    | 0.842811073 | 0.034280886 | -2.5448  | -1.31496 | -0.39507 |
| LY49S6     | 0.842811073 | 0.034347054 | -2.54356 | -1.31576 | -0.16126 |
| ADAM1A     | 0.842811073 | 0.034663469 | -2.53769 | -1.31958 | -0.17986 |
| RPS19BP1   | 0.842811073 | 0.034681189 | -2.53736 | -1.31979 | -0.34421 |
| POLE       | 0.842811073 | 0.034995568 | -2.53158 | -1.32354 | -0.20999 |
| TRUB1      | 0.842811073 | 0.035312749 | -2.5258  | -1.3273  | -0.30921 |
| LHFPL1     | 0.842811073 | 0.036509662 | -2.50447 | -1.34121 | -0.53324 |
| AIFM3      | 0.842811073 | 0.036821724 | -2.49902 | -1.34477 | -0.45128 |
| KCTD4      | 0.842811073 | 0.037068555 | -2.49474 | -1.34756 | -0.16046 |
| FAM193B    | 0.842811073 | 0.03721112  | -2.49229 | -1.34917 | -0.32564 |
| MMP9       | 0.842811073 | 0.037233297 | -2.49191 | -1.34942 | -0.11183 |
| CEP70      | 0.842811073 | 0.037426904 | -2.48859 | -1.35159 | -0.69398 |
| LOC500594  | 0.842811073 | 0.03747498  | -2.48777 | -1.35213 | -0.14334 |
| TMPO       | 0.842811073 | 0.038041428 | -2.47817 | -1.35842 | -0.58303 |
| MLLT10     | 0.842811073 | 0.03865008  | -2.46802 | -1.36508 | -0.3053  |
| OGG1       | 0.842811073 | 0.038993071 | -2.46237 | -1.36879 | -0.31328 |
| CNTD1      | 0.842811073 | 0.039034444 | -2.46169 | -1.36924 | -0.24933 |
| CNR2       | 0.842811073 | 0.039161882 | -2.4596  | -1.37061 | -0.34671 |
| CACNA1D    | 0.842811073 | 0.039257461 | -2.45805 | -1.37163 | -1.39818 |
| AOX2       | 0.842811073 | 0.039329248 | -2.45688 | -1.3724  | -0.15569 |
| SPDL1      | 0.842811073 | 0.039694532 | -2.45097 | -1.37629 | -0.21916 |
| LUC7L3     | 0.842811073 | 0.0401624   | -2.44347 | -1.38122 | -0.3979  |
| PNMA5      | 0.842811073 | 0.04031534  | -2.44104 | -1.38283 | -1.02495 |
| LY49I5     | 0.842811073 | 0.040455698 | -2.43882 | -1.38429 | -0.09176 |
| PDZD3      | 0.842811073 | 0.04045901  | -2.43877 | -1.38432 | -0.28667 |
| UBE3D      | 0.842811073 | 0.040548323 | -2.43736 | -1.38525 | -0.35913 |
| CLK4       | 0.842811073 | 0.040555037 | -2.43725 | -1.38532 | -0.49686 |
| RGS6       | 0.842811073 | 0.040875709 | -2.43222 | -1.38865 | -1.16805 |
| RGD1309106 | 0.842811073 | 0.041308588 | -2.42549 | -1.39309 | -0.29357 |
| IL7        | 0.842811073 | 0.041347212 | -2.42489 | -1.39349 | -0.8824  |
| C8G        | 0.842811073 | 0.041407871 | -2.42395 | -1.39411 | -0.5282  |
| CLEC1B     | 0.842811073 | 0.041515547 | -2.42229 | -1.3952  | -0.43832 |
| P2RY4      | 0.842811073 | 0.041658459 | -2.42009 | -1.39666 | -0.15928 |
| BC1        | 0.842811073 | 0.041869183 | -2.41687 | -1.39879 | -1.48905 |
| TNFRSF19   | 0.842811073 | 0.042050015 | -2.41411 | -1.40061 | -0.78041 |
| MIR6334    | 0.842811073 | 0.042218879 | -2.41155 | -1.40231 | -4.20195 |
| ITPR2      | 0.842811073 | 0.042859245 | -2.40193 | -1.40868 | -0.58917 |
| ATP13A4    | 0.842811073 | 0.042917155 | -2.40107 | -1.40925 | -0.82098 |
| MBOAT1     | 0.842811073 | 0.042921455 | -2.40101 | -1.40929 | -2.11884 |
| RSRP1      | 0.842811073 | 0.043028115 | -2.39942 | -1.41034 | -0.4797  |
| OVCA2      | 0.842811073 | 0.043112306 | -2.39817 | -1.41117 | -0.37414 |

|            |             |             |          |          |          |
|------------|-------------|-------------|----------|----------|----------|
| B3GNT7     | 0.842811073 | 0.043425706 | -2.39354 | -1.41424 | -1.30794 |
| MT4        | 0.842811073 | 0.043462401 | -2.393   | -1.4146  | -0.79349 |
| KCNG4      | 0.842811073 | 0.04353344  | -2.39196 | -1.41529 | -0.359   |
| LOC499240  | 0.842811073 | 0.04362432  | -2.39063 | -1.41618 | -0.25134 |
| RBM26      | 0.842811073 | 0.043653148 | -2.3902  | -1.41646 | -0.59101 |
| MEFV       | 0.842811073 | 0.043755202 | -2.38871 | -1.41745 | -0.33821 |
| UBE2D4     | 0.842811073 | 0.044060594 | -2.38427 | -1.4204  | -0.22374 |
| FANCA      | 0.842811073 | 0.044475948 | -2.37827 | -1.42438 | -0.48501 |
| RLBP1      | 0.842811073 | 0.04457723  | -2.37682 | -1.42535 | -0.17981 |
| AXIN2      | 0.842811073 | 0.044617426 | -2.37624 | -1.42573 | -1.14955 |
| HEXDC      | 0.842811073 | 0.044831762 | -2.37318 | -1.42777 | -0.59323 |
| ERCC6      | 0.842811073 | 0.04501119  | -2.37063 | -1.42947 | -0.19606 |
| GP1BA      | 0.842811073 | 0.045427954 | -2.36474 | -1.43338 | -0.18424 |
| EDN1       | 0.842811073 | 0.045477597 | -2.36404 | -1.43385 | -0.24308 |
| MEIOB      | 0.842811073 | 0.04551022  | -2.36358 | -1.43415 | -0.1221  |
| SYT12      | 0.842811073 | 0.045773312 | -2.3599  | -1.43661 | -0.29423 |
| ZFP451     | 0.842811073 | 0.045791474 | -2.35965 | -1.43678 | -0.26937 |
| ZMYND12    | 0.842811073 | 0.045880055 | -2.35841 | -1.4376  | -0.39289 |
| APEX2      | 0.842811073 | 0.046247726 | -2.35331 | -1.441   | -0.36337 |
| CLEC2D2    | 0.842811073 | 0.046362097 | -2.35174 | -1.44205 | -0.24788 |
| GLUL       | 0.842811073 | 0.046819489 | -2.34546 | -1.44624 | -1.53623 |
| ESR2       | 0.842811073 | 0.046978723 | -2.34329 | -1.44768 | -0.8092  |
| NPL        | 0.842811073 | 0.047321164 | -2.33865 | -1.45078 | -0.6702  |
| RMND1      | 0.842811073 | 0.047836969 | -2.33173 | -1.45541 | -0.3332  |
| RGD1309779 | 0.842811073 | 0.048019565 | -2.32929 | -1.45704 | -0.54334 |
| RNF180     | 0.842811073 | 0.048112019 | -2.32807 | -1.45786 | -2.28778 |
| ATP6V1C2   | 0.842811073 | 0.04831539  | -2.32537 | -1.45966 | -1.97754 |
| MDM4       | 0.842811073 | 0.048332762 | -2.32514 | -1.45982 | -0.25597 |
| DEPDC1B    | 0.842811073 | 0.049621785 | -2.30832 | -1.47108 | -0.12136 |

| day30_DEG_0.05_EvsISUp | adj.P.Val | P.Value  | t        | B        | logFC    |
|------------------------|-----------|----------|----------|----------|----------|
| ARID5A                 | 0.842811  | 0.000337 | 5.941414 | 0.12213  | 0.458279 |
| POLD2                  | 0.842811  | 0.000739 | 5.270743 | -0.05332 | 0.518639 |
| KLF6                   | 0.842811  | 0.001174 | 4.898776 | -0.16894 | 0.743361 |
| RAP2B                  | 0.842811  | 0.00175  | 4.58967  | -0.27656 | 0.532018 |
| XPR1                   | 0.842811  | 0.001801 | 4.568119 | -0.28449 | 0.482416 |
| BAG3                   | 0.842811  | 0.002045 | 4.472208 | -0.32045 | 1.216912 |
| PLD2                   | 0.842811  | 0.002236 | 4.405439 | -0.34617 | 0.20677  |
| S100A5                 | 0.842811  | 0.002447 | 4.338481 | -0.37253 | 0.501297 |
| RIC3                   | 0.842811  | 0.002462 | 4.333989 | -0.37432 | 0.227663 |
| EPHA2                  | 0.842811  | 0.002604 | 4.292615 | -0.39092 | 0.503846 |
| CISD3                  | 0.842811  | 0.002671 | 4.273936 | -0.39849 | 0.427302 |
| UBE2A                  | 0.842811  | 0.002676 | 4.272311 | -0.39916 | 0.463136 |
| PEX19                  | 0.842811  | 0.00299  | 4.191197 | -0.43259 | 0.339617 |
| KLF4                   | 0.842811  | 0.003006 | 4.187383 | -0.43418 | 0.45882  |
| PHF2                   | 0.842811  | 0.003155 | 4.152248 | -0.44895 | 0.395505 |
| PELI3                  | 0.842811  | 0.003198 | 4.142416 | -0.45312 | 0.279992 |
| IL13RA1                | 0.842811  | 0.003291 | 4.121709 | -0.46193 | 0.561685 |
| AES                    | 0.842811  | 0.003357 | 4.107457 | -0.46803 | 0.483563 |
| RGD1561157             | 0.842811  | 0.003844 | 4.010143 | -0.51044 | 0.492072 |
| DCTPP1                 | 0.842811  | 0.003999 | 3.98194  | -0.52298 | 0.618381 |
| PPDPF                  | 0.842811  | 0.004016 | 3.979035 | -0.52427 | 0.453257 |
| FAM96B                 | 0.842811  | 0.004039 | 3.974925 | -0.52611 | 0.551515 |
| EDA                    | 0.842811  | 0.004073 | 3.968974 | -0.52878 | 0.298154 |
| AP4S1                  | 0.842811  | 0.004234 | 3.941424 | -0.54118 | 0.510779 |
| CACNA1G                | 0.842811  | 0.004283 | 3.933287 | -0.54487 | 0.40682  |
| MAB21L1                | 0.842811  | 0.004296 | 3.93114  | -0.54584 | 0.420486 |
| FOXO1                  | 0.842811  | 0.004417 | 3.911488 | -0.55479 | 0.522785 |
| SEC14L1                | 0.842811  | 0.004691 | 3.868995 | -0.57432 | 0.346232 |
| P4HA1                  | 0.842811  | 0.004884 | 3.840686 | -0.58747 | 0.959609 |
| IFI27L2B               | 0.842811  | 0.004935 | 3.833408 | -0.59087 | 1.053824 |
| RUNX1                  | 0.842811  | 0.005295 | 3.784067 | -0.61413 | 0.794685 |
| SRF                    | 0.842811  | 0.005344 | 3.777653 | -0.61718 | 0.364317 |
| HERPUD2                | 0.842811  | 0.005736 | 3.728424 | -0.64079 | 0.518629 |
| PTPN21                 | 0.842811  | 0.005765 | 3.724921 | -0.64248 | 0.521145 |
| S1PR3                  | 0.842811  | 0.005958 | 3.702103 | -0.65356 | 0.77478  |
| IRF2BPL                | 0.842811  | 0.005961 | 3.701686 | -0.65376 | 0.453864 |
| WSB2                   | 0.842811  | 0.006027 | 3.694069 | -0.65747 | 0.609951 |
| RAMP2                  | 0.842811  | 0.006086 | 3.687376 | -0.66074 | 1.228643 |
| AK3                    | 0.842811  | 0.006182 | 3.676482 | -0.66608 | 0.496973 |
| NDRG3                  | 0.842811  | 0.006203 | 3.674223 | -0.66719 | 0.316225 |
| TULP4                  | 0.842811  | 0.006237 | 3.670364 | -0.66909 | 0.456121 |
| OSBP2                  | 0.842811  | 0.006277 | 3.66598  | -0.67124 | 0.420264 |
| IER5L                  | 0.842811  | 0.006307 | 3.662744 | -0.67284 | 0.400715 |
| ANXA6                  | 0.842811  | 0.006316 | 3.661754 | -0.67333 | 0.729896 |
| EPS15                  | 0.842811  | 0.00648  | 3.644097 | -0.68205 | 0.351353 |
| FLAD1                  | 0.842811  | 0.006639 | 3.627386 | -0.69036 | 0.271655 |

|           |          |          |          |          |          |
|-----------|----------|----------|----------|----------|----------|
| BRI3      | 0.842811 | 0.00671  | 3.620056 | -0.69401 | 0.681962 |
| CTDSP1    | 0.842811 | 0.006847 | 3.606196 | -0.70094 | 0.473841 |
| SDC4      | 0.842811 | 0.007022 | 3.588893 | -0.70964 | 0.96467  |
| PAQR4     | 0.842811 | 0.007196 | 3.572093 | -0.71812 | 0.770176 |
| CPA3      | 0.842811 | 0.007248 | 3.567195 | -0.72061 | 0.785542 |
| GPX3      | 0.842811 | 0.007272 | 3.5649   | -0.72177 | 1.21238  |
| ITGB4     | 0.842811 | 0.00732  | 3.560416 | -0.72405 | 1.095655 |
| INPP5F    | 0.842811 | 0.007346 | 3.557999 | -0.72527 | 0.784202 |
| GALNT10   | 0.842811 | 0.007678 | 3.527853 | -0.74067 | 0.543531 |
| GDE1      | 0.842811 | 0.007742 | 3.522167 | -0.74359 | 0.822967 |
| TNFRSF11A | 0.842811 | 0.007884 | 3.509856 | -0.74993 | 0.535561 |
| TTC7B     | 0.842811 | 0.007995 | 3.500299 | -0.75486 | 0.686466 |
| ARIH1     | 0.842811 | 0.008652 | 3.446789 | -0.78274 | 0.322587 |
| SLC2A8    | 0.842811 | 0.00866  | 3.446157 | -0.78307 | 0.316373 |
| TNFRSF12A | 0.842811 | 0.008895 | 3.428087 | -0.79259 | 0.501587 |
| NOTCH2    | 0.842811 | 0.008921 | 3.426124 | -0.79362 | 0.468669 |
| BCORL1    | 0.842811 | 0.008969 | 3.422501 | -0.79554 | 0.305291 |
| GPS2      | 0.842811 | 0.00914  | 3.409702 | -0.80232 | 0.536015 |
| FAM55B    | 0.842811 | 0.00918  | 3.406762 | -0.80388 | 0.716387 |
| EIF3E     | 0.842811 | 0.00922  | 3.403871 | -0.80541 | 0.30592  |
| HYAL1     | 0.842811 | 0.00924  | 3.402422 | -0.80618 | 0.992401 |
| AGO2      | 0.842811 | 0.009438 | 3.388098 | -0.81382 | 0.361334 |
| LATS2     | 0.842811 | 0.009444 | 3.387654 | -0.81405 | 0.458014 |
| FGF13     | 0.842811 | 0.009623 | 3.375058 | -0.82079 | 1.8025   |
| CD99      | 0.842811 | 0.009628 | 3.374686 | -0.82099 | 0.648641 |
| PLIN2     | 0.842811 | 0.009647 | 3.373365 | -0.8217  | 0.690654 |
| PPL       | 0.842811 | 0.009655 | 3.372851 | -0.82197 | 0.459921 |
| KCNMA1    | 0.842811 | 0.009672 | 3.37165  | -0.82262 | 1.1812   |
| SYT3      | 0.842811 | 0.009708 | 3.369125 | -0.82397 | 0.226328 |
| NKIRAS2   | 0.842811 | 0.009716 | 3.368566 | -0.82427 | 0.640481 |
| MAOA      | 0.842811 | 0.009784 | 3.363913 | -0.82677 | 0.570221 |
| KCTD7     | 0.842811 | 0.009904 | 3.355748 | -0.83117 | 0.423834 |
| TMEM178A  | 0.842811 | 0.009923 | 3.354455 | -0.83186 | 0.194751 |
| PTGIS     | 0.842811 | 0.010004 | 3.348988 | -0.83481 | 0.470355 |
| PPP2R2A   | 0.842811 | 0.010024 | 3.347602 | -0.83556 | 0.381874 |
| TUBB4B    | 0.842811 | 0.010105 | 3.342229 | -0.83846 | 0.443175 |
| FGFR3     | 0.842811 | 0.010178 | 3.33742  | -0.84106 | 0.670202 |
| ATP5G1    | 0.842811 | 0.01031  | 3.32879  | -0.84574 | 0.754304 |
| UGT1A3    | 0.842811 | 0.010354 | 3.325908 | -0.84731 | 0.139596 |
| MAP7D1    | 0.842811 | 0.010605 | 3.309907 | -0.85602 | 0.762908 |
| ACE       | 0.842811 | 0.010618 | 3.309103 | -0.85646 | 0.703678 |
| MYL12A    | 0.842811 | 0.01086  | 3.294024 | -0.8647  | 0.472954 |
| DCTN1     | 0.842811 | 0.011004 | 3.285195 | -0.86955 | 0.434589 |
| QSOX1     | 0.842811 | 0.011091 | 3.279965 | -0.87242 | 1.181038 |
| ENO1      | 0.842811 | 0.011219 | 3.272342 | -0.87662 | 0.394978 |
| NFATC2IP  | 0.842811 | 0.011287 | 3.268266 | -0.87887 | 0.347105 |
| PRKD3     | 0.842811 | 0.011306 | 3.26717  | -0.87947 | 0.460971 |

|         |          |          |          |          |          |
|---------|----------|----------|----------|----------|----------|
| DDX58   | 0.842811 | 0.01134  | 3.265154 | -0.88058 | 0.362987 |
| DYNLRB1 | 0.842811 | 0.01135  | 3.264582 | -0.8809  | 0.403576 |
| NFYB    | 0.842811 | 0.011551 | 3.252882 | -0.88737 | 0.261592 |
| NEDD4L  | 0.842811 | 0.011733 | 3.242506 | -0.89313 | 0.909016 |
| XPNPEP2 | 0.842811 | 0.011794 | 3.239017 | -0.89507 | 0.127086 |
| RPS6KA3 | 0.842811 | 0.011918 | 3.232094 | -0.89892 | 0.845616 |
| ATG2A   | 0.842811 | 0.011962 | 3.229623 | -0.9003  | 0.269226 |
| HDGF    | 0.842811 | 0.012044 | 3.225109 | -0.90282 | 0.501545 |
| IFIT1   | 0.842811 | 0.012059 | 3.224243 | -0.9033  | 0.387532 |
| SRPX2   | 0.842811 | 0.012532 | 3.19873  | -0.91759 | 0.408916 |
| SOX13   | 0.842811 | 0.012541 | 3.198244 | -0.91787 | 0.207826 |
| ZFP710  | 0.842811 | 0.012861 | 3.181586 | -0.92725 | 0.248817 |
| JMJD4   | 0.842811 | 0.012868 | 3.181197 | -0.92747 | 0.252188 |
| ZBTB20  | 0.842811 | 0.013168 | 3.165964 | -0.93609 | 0.503055 |
| STXBP5  | 0.842811 | 0.013257 | 3.161504 | -0.93862 | 0.279813 |
| PXN     | 0.842811 | 0.01326  | 3.161345 | -0.93871 | 0.569852 |
| CSNK2B  | 0.842811 | 0.013264 | 3.161147 | -0.93882 | 0.366215 |
| ATP1B1  | 0.842811 | 0.013313 | 3.158703 | -0.94021 | 0.581416 |
| TUBGCP2 | 0.842811 | 0.013444 | 3.15224  | -0.94389 | 0.280753 |
| KIF3C   | 0.842811 | 0.013709 | 3.139336 | -0.95124 | 1.157065 |
| DNAL1   | 0.842811 | 0.013768 | 3.136506 | -0.95286 | 0.765289 |
| PPP1CB  | 0.842811 | 0.013865 | 3.131894 | -0.95549 | 0.619456 |
| SYPL1   | 0.842811 | 0.013891 | 3.13064  | -0.95621 | 0.468419 |
| ATF7    | 0.842811 | 0.013948 | 3.127934 | -0.95776 | 0.272003 |
| CCNK    | 0.842811 | 0.014149 | 3.118514 | -0.96316 | 0.249121 |
| R3HDM2  | 0.842811 | 0.014266 | 3.113083 | -0.96628 | 0.639746 |
| UCHL1   | 0.842811 | 0.01432  | 3.110621 | -0.96769 | 1.892768 |
| ZMYND11 | 0.842811 | 0.01435  | 3.109208 | -0.96851 | 0.293714 |
| TCEB2   | 0.842811 | 0.014405 | 3.106709 | -0.96994 | 0.396595 |
| DUSP8   | 0.842811 | 0.014665 | 3.094906 | -0.97675 | 0.828534 |
| FOXQ1   | 0.842811 | 0.014721 | 3.092415 | -0.97819 | 1.137027 |
| DNAJB4  | 0.842811 | 0.014743 | 3.09143  | -0.97876 | 0.39655  |
| PPP1R36 | 0.842811 | 0.014789 | 3.08941  | -0.97992 | 1.110409 |
| GSTM1   | 0.842811 | 0.014796 | 3.089092 | -0.98011 | 1.011242 |
| VPS4A   | 0.842811 | 0.014839 | 3.087185 | -0.98121 | 0.288016 |
| SIK1    | 0.842811 | 0.014843 | 3.086999 | -0.98132 | 1.036673 |
| LAMTOR1 | 0.842811 | 0.014864 | 3.086049 | -0.98187 | 0.381943 |
| FEM1C   | 0.842811 | 0.014987 | 3.080627 | -0.98501 | 0.230071 |
| TLR4    | 0.842811 | 0.015049 | 3.077944 | -0.98656 | 0.49243  |
| CARM1   | 0.842811 | 0.015116 | 3.075008 | -0.98826 | 0.409905 |
| PDPN    | 0.842811 | 0.015187 | 3.071946 | -0.99004 | 0.48595  |
| OSR1    | 0.842811 | 0.015208 | 3.071042 | -0.99057 | 0.671266 |
| TMPRSS2 | 0.842811 | 0.015284 | 3.067733 | -0.99249 | 1.244185 |
| BCL9L   | 0.842811 | 0.01539  | 3.063225 | -0.99511 | 0.210431 |
| FLOT1   | 0.842811 | 0.015425 | 3.061704 | -0.996   | 0.443593 |
| CDC42   | 0.842811 | 0.015532 | 3.057187 | -0.99863 | 0.379189 |
| MRPL41  | 0.842811 | 0.015562 | 3.055911 | -0.99937 | 0.320459 |

|            |          |          |          |          |          |
|------------|----------|----------|----------|----------|----------|
| CWC15      | 0.842811 | 0.015644 | 3.052451 | -1.00139 | 0.212964 |
| CDKL2      | 0.842811 | 0.015687 | 3.050651 | -1.00244 | 0.581717 |
| LTBP2      | 0.842811 | 0.015749 | 3.04806  | -1.00395 | 0.615217 |
| FAM219A    | 0.842811 | 0.015968 | 3.039037 | -1.00923 | 0.488919 |
| LOC689226  | 0.842811 | 0.01619  | 3.029981 | -1.01454 | 0.365848 |
| SIX2       | 0.842811 | 0.016342 | 3.023869 | -1.01812 | 0.301428 |
| PDLIM1     | 0.842811 | 0.016421 | 3.020712 | -1.01998 | 0.967065 |
| ZFP281     | 0.842811 | 0.016426 | 3.020506 | -1.0201  | 0.717879 |
| LOC688869  | 0.842811 | 0.016437 | 3.020043 | -1.02037 | 0.544128 |
| SCNM1      | 0.842811 | 0.016439 | 3.019987 | -1.02041 | 0.540058 |
| CUTA       | 0.842811 | 0.01653  | 3.016353 | -1.02254 | 0.207682 |
| ANXA8      | 0.842811 | 0.017051 | 2.996068 | -1.03451 | 1.056429 |
| ST13       | 0.842811 | 0.017176 | 2.991294 | -1.03734 | 0.40956  |
| RGD1566320 | 0.842811 | 0.017245 | 2.988688 | -1.03888 | 0.617046 |
| PARP3      | 0.842811 | 0.017364 | 2.984183 | -1.04155 | 0.781831 |
| MMP15      | 0.842811 | 0.017373 | 2.983829 | -1.04176 | 0.487433 |
| SNF8       | 0.842811 | 0.017495 | 2.979281 | -1.04446 | 0.347291 |
| ANXA11     | 0.842811 | 0.017496 | 2.979244 | -1.04449 | 0.313285 |
| MCPT1L1    | 0.842811 | 0.017569 | 2.976509 | -1.04611 | 1.101119 |
| PTGS1      | 0.842811 | 0.017612 | 2.974914 | -1.04706 | 0.475082 |
| CHCHD4     | 0.842811 | 0.017657 | 2.973256 | -1.04804 | 0.428976 |
| UBXN1      | 0.842811 | 0.017777 | 2.968837 | -1.05067 | 0.644124 |
| SNX3       | 0.842811 | 0.018032 | 2.959556 | -1.05621 | 0.459865 |
| FLII       | 0.842811 | 0.018153 | 2.95516  | -1.05883 | 0.317833 |
| AMOTL2     | 0.842811 | 0.01823  | 2.952414 | -1.06047 | 0.523416 |
| CST3       | 0.842811 | 0.018258 | 2.951399 | -1.06108 | 0.6224   |
| NCOA2      | 0.842811 | 0.018463 | 2.944142 | -1.06542 | 0.324694 |
| ICT1       | 0.842811 | 0.018493 | 2.943075 | -1.06606 | 0.302974 |
| PDXP       | 0.842811 | 0.018586 | 2.939805 | -1.06802 | 0.361217 |
| EPN1       | 0.842811 | 0.01859  | 2.939669 | -1.0681  | 0.349413 |
| PORCN      | 0.842811 | 0.018722 | 2.935073 | -1.07086 | 0.652164 |
| FLT3LG     | 0.842811 | 0.018753 | 2.933982 | -1.07151 | 0.344468 |
| MYEOV2     | 0.842811 | 0.018757 | 2.933857 | -1.07159 | 0.331234 |
| BCAP29     | 0.842811 | 0.018855 | 2.930461 | -1.07362 | 0.608356 |
| FZD9       | 0.842811 | 0.019112 | 2.921655 | -1.07892 | 0.33488  |
| ADM2       | 0.842811 | 0.019151 | 2.920318 | -1.07972 | 0.700763 |
| SLC35D1    | 0.842811 | 0.01929  | 2.915598 | -1.08257 | 0.616113 |
| STXBP1     | 0.842811 | 0.019358 | 2.913332 | -1.08393 | 0.901038 |
| IFT57      | 0.842811 | 0.019437 | 2.910673 | -1.08554 | 0.595671 |
| PLXDC1     | 0.842811 | 0.01945  | 2.91022  | -1.08581 | 0.347582 |
| MOB2       | 0.842811 | 0.019577 | 2.906003 | -1.08836 | 0.313203 |
| RP9        | 0.842811 | 0.019621 | 2.904543 | -1.08924 | 0.286415 |
| CRYM       | 0.842811 | 0.019822 | 2.897906 | -1.09325 | 0.34427  |
| ACYP1      | 0.842811 | 0.019823 | 2.89789  | -1.09326 | 0.792724 |
| EIF2B2     | 0.842811 | 0.019893 | 2.895591 | -1.09466 | 0.466363 |
| CDC123     | 0.842811 | 0.019921 | 2.894676 | -1.09521 | 0.586567 |
| MFSD6      | 0.842811 | 0.020102 | 2.888792 | -1.09877 | 0.439915 |

|            |          |          |          |          |          |
|------------|----------|----------|----------|----------|----------|
| GPSM1      | 0.842811 | 0.020123 | 2.888123 | -1.09918 | 0.322225 |
| NAP1L1     | 0.842811 | 0.020196 | 2.885776 | -1.1006  | 0.572068 |
| MSN        | 0.842811 | 0.020225 | 2.884844 | -1.10117 | 0.576217 |
| CKMT1B     | 0.842811 | 0.02026  | 2.88372  | -1.10185 | 1.001678 |
| USMG5      | 0.842811 | 0.020301 | 2.882394 | -1.10266 | 0.613561 |
| JUN        | 0.842811 | 0.020342 | 2.88108  | -1.10346 | 0.792852 |
| NUDT18     | 0.842811 | 0.020411 | 2.878893 | -1.10479 | 0.225917 |
| PCBP4      | 0.842811 | 0.020418 | 2.878679 | -1.10492 | 0.475926 |
| IFIT2      | 0.842811 | 0.020514 | 2.875631 | -1.10677 | 0.385217 |
| NET1       | 0.842811 | 0.020529 | 2.87516  | -1.10705 | 0.382596 |
| PARM1      | 0.842811 | 0.020606 | 2.872721 | -1.10854 | 1.836339 |
| SERPINA11  | 0.842811 | 0.020671 | 2.870691 | -1.10977 | 0.246451 |
| STK38L     | 0.842811 | 0.020712 | 2.869394 | -1.11056 | 0.355498 |
| LOC498368  | 0.842811 | 0.020716 | 2.869264 | -1.11064 | 1.345292 |
| KRT19      | 0.842811 | 0.020846 | 2.865223 | -1.11311 | 1.164895 |
| NFIB       | 0.842811 | 0.020998 | 2.8605   | -1.11599 | 0.320355 |
| UQCRH      | 0.842811 | 0.021202 | 2.854224 | -1.11982 | 0.823988 |
| DNAJB12    | 0.842811 | 0.021292 | 2.851493 | -1.12149 | 0.328585 |
| TP53INP1   | 0.842811 | 0.021466 | 2.846191 | -1.12473 | 0.922539 |
| NDUFB10    | 0.842811 | 0.021508 | 2.844926 | -1.12551 | 0.470036 |
| RAPH1      | 0.842811 | 0.021626 | 2.841402 | -1.12767 | 0.611573 |
| RNF10      | 0.842811 | 0.02168  | 2.839767 | -1.12867 | 0.536482 |
| MVP        | 0.842811 | 0.021722 | 2.838519 | -1.12943 | 0.312881 |
| LAMA5      | 0.842811 | 0.021821 | 2.835589 | -1.13123 | 0.557845 |
| RNASE1L2   | 0.842811 | 0.021886 | 2.833638 | -1.13243 | 0.239074 |
| FOS        | 0.842811 | 0.021971 | 2.831154 | -1.13395 | 0.627742 |
| TMEM185B   | 0.842811 | 0.022134 | 2.826367 | -1.13689 | 0.32414  |
| FOXK1      | 0.842811 | 0.022153 | 2.825811 | -1.13724 | 0.341619 |
| TRIB2      | 0.842811 | 0.02228  | 2.822104 | -1.13952 | 0.771393 |
| NSMCE1     | 0.842811 | 0.022374 | 2.819374 | -1.1412  | 0.320147 |
| RPP21      | 0.842811 | 0.022386 | 2.819035 | -1.14141 | 0.440935 |
| MIR27B     | 0.842811 | 0.022473 | 2.816505 | -1.14296 | 4.326444 |
| PPP6C      | 0.842811 | 0.022485 | 2.81618  | -1.14316 | 0.385041 |
| MGRN1      | 0.842811 | 0.022537 | 2.814673 | -1.14409 | 0.307786 |
| RGD1311892 | 0.842811 | 0.022541 | 2.814562 | -1.14416 | 0.489791 |
| CUEDC1     | 0.842811 | 0.022577 | 2.813538 | -1.14479 | 0.409183 |
| STC1       | 0.842811 | 0.022649 | 2.811473 | -1.14607 | 0.537385 |
| LIMD1      | 0.842811 | 0.022743 | 2.808785 | -1.14772 | 0.192135 |
| MUM1       | 0.842811 | 0.022792 | 2.807408 | -1.14857 | 0.215089 |
| CLCN6      | 0.842811 | 0.022798 | 2.807231 | -1.14868 | 0.355714 |
| TCN2       | 0.842811 | 0.022854 | 2.805633 | -1.14967 | 0.522564 |
| TTL        | 0.842811 | 0.022863 | 2.805393 | -1.14982 | 0.681438 |
| STK40      | 0.842811 | 0.022905 | 2.804212 | -1.15055 | 0.455613 |
| ATP6V1D    | 0.842811 | 0.022912 | 2.803989 | -1.15069 | 0.336147 |
| PAQR8      | 0.842811 | 0.022922 | 2.803723 | -1.15085 | 1.947009 |
| MMP19      | 0.842811 | 0.022929 | 2.803515 | -1.15098 | 0.411197 |
| TAB2       | 0.842811 | 0.022937 | 2.803307 | -1.15111 | 0.377645 |

|           |          |          |          |          |          |
|-----------|----------|----------|----------|----------|----------|
| RWDD1     | 0.842811 | 0.022946 | 2.803043 | -1.15127 | 0.403735 |
| MAPRE2    | 0.842811 | 0.023103 | 2.798642 | -1.15399 | 0.755248 |
| ULK2      | 0.842811 | 0.023131 | 2.797849 | -1.15448 | 0.411404 |
| LSM12     | 0.842811 | 0.02314  | 2.797595 | -1.15464 | 0.288194 |
| TM4SF19   | 0.842811 | 0.02318  | 2.796485 | -1.15533 | 0.094769 |
| TSC1      | 0.842811 | 0.023313 | 2.792796 | -1.15761 | 0.303314 |
| C1GALT1   | 0.842811 | 0.023406 | 2.790201 | -1.15922 | 0.493247 |
| CYP2S1    | 0.842811 | 0.023485 | 2.788038 | -1.16056 | 0.33667  |
| PTP4A1    | 0.842811 | 0.023646 | 2.783617 | -1.1633  | 0.50394  |
| COA5      | 0.842811 | 0.023705 | 2.781994 | -1.1643  | 0.295577 |
| TULP1     | 0.842811 | 0.023706 | 2.781983 | -1.16431 | 0.14955  |
| MAP4K5    | 0.842811 | 0.02379  | 2.779703 | -1.16573 | 0.806086 |
| DIAPH1    | 0.842811 | 0.023858 | 2.777862 | -1.16687 | 0.637341 |
| ALKBH7    | 0.842811 | 0.023883 | 2.777176 | -1.1673  | 0.219219 |
| CDK16     | 0.842811 | 0.023961 | 2.775057 | -1.16861 | 0.420261 |
| LBR       | 0.842811 | 0.024058 | 2.772454 | -1.17023 | 0.429428 |
| PPP3R1    | 0.842811 | 0.024064 | 2.772289 | -1.17033 | 0.488008 |
| AKR1C12   | 0.842811 | 0.024165 | 2.769607 | -1.172   | 0.328324 |
| NSA2      | 0.842811 | 0.024331 | 2.765177 | -1.17476 | 0.369988 |
| LOC680039 | 0.842811 | 0.024334 | 2.765088 | -1.17482 | 0.505214 |
| SIPA1L2   | 0.842811 | 0.02434  | 2.764931 | -1.17491 | 0.517178 |
| ETFB      | 0.842811 | 0.02445  | 2.762016 | -1.17673 | 0.5168   |
| RANBP6    | 0.842811 | 0.024515 | 2.760309 | -1.17779 | 0.241641 |
| MTURN     | 0.842811 | 0.024573 | 2.758777 | -1.17875 | 0.557233 |
| DIRC2     | 0.842811 | 0.024599 | 2.758101 | -1.17917 | 0.552431 |
| DMD       | 0.842811 | 0.024641 | 2.757014 | -1.17985 | 0.630071 |
| SLC10A4   | 0.842811 | 0.024659 | 2.756522 | -1.18016 | 1.387162 |
| FBXO6     | 0.842811 | 0.024865 | 2.75117  | -1.1835  | 0.392061 |
| ABHD8     | 0.842811 | 0.024875 | 2.750894 | -1.18367 | 0.417867 |
| C2CD2     | 0.842811 | 0.024888 | 2.750564 | -1.18387 | 0.320014 |
| TTC1      | 0.842811 | 0.02505  | 2.746374 | -1.18649 | 0.41291  |
| NOP10     | 0.842811 | 0.025103 | 2.745025 | -1.18734 | 0.496348 |
| SF3A2     | 0.842811 | 0.025195 | 2.742658 | -1.18882 | 0.345127 |
| LOC690871 | 0.842811 | 0.0252   | 2.742532 | -1.1889  | 0.473335 |
| FAM65A    | 0.842811 | 0.025203 | 2.742448 | -1.18895 | 0.347708 |
| RABEP1    | 0.842811 | 0.025244 | 2.741411 | -1.1896  | 0.221636 |
| UBE2M     | 0.842811 | 0.025248 | 2.741314 | -1.18966 | 0.381273 |
| TBC1D2    | 0.842811 | 0.025383 | 2.737863 | -1.19182 | 0.327974 |
| RBFOX2    | 0.842811 | 0.02547  | 2.735665 | -1.19319 | 0.335723 |
| CTGF      | 0.842811 | 0.025498 | 2.734938 | -1.19365 | 0.940861 |
| FDXR      | 0.842811 | 0.025524 | 2.734282 | -1.19406 | 0.252218 |
| TUBG1     | 0.842811 | 0.025543 | 2.733816 | -1.19435 | 0.494965 |
| GSPT2     | 0.842811 | 0.025617 | 2.731949 | -1.19552 | 0.41362  |
| COPS2     | 0.842811 | 0.025665 | 2.730747 | -1.19628 | 0.339905 |
| RAPGEF2   | 0.842811 | 0.025692 | 2.730052 | -1.19671 | 0.26261  |
| ATP5SL    | 0.842811 | 0.025889 | 2.725132 | -1.1998  | 0.209027 |
| ELMO1     | 0.842811 | 0.025927 | 2.72419  | -1.20039 | 0.606323 |

|            |          |          |          |          |          |
|------------|----------|----------|----------|----------|----------|
| KLF13      | 0.842811 | 0.026045 | 2.721282 | -1.20222 | 0.512827 |
| ZFP703     | 0.842811 | 0.026058 | 2.720949 | -1.20243 | 0.730279 |
| KALRN      | 0.842811 | 0.026197 | 2.717512 | -1.20459 | 0.276341 |
| CLTB       | 0.842811 | 0.026201 | 2.717412 | -1.20465 | 0.582005 |
| CHODL      | 0.842811 | 0.026304 | 2.714897 | -1.20623 | 0.661812 |
| SLC31A2    | 0.842811 | 0.026324 | 2.714404 | -1.20654 | 1.074543 |
| CAPG       | 0.842811 | 0.026338 | 2.714072 | -1.20675 | 0.971163 |
| HIGD1A     | 0.842811 | 0.026618 | 2.707249 | -1.21105 | 0.568674 |
| KAT2A      | 0.842811 | 0.026645 | 2.706606 | -1.21145 | 0.225681 |
| ABC7       | 0.842811 | 0.026763 | 2.703749 | -1.21325 | 0.213754 |
| TMEM237    | 0.842811 | 0.026768 | 2.70363  | -1.21333 | 0.494807 |
| PMM1       | 0.842811 | 0.027152 | 2.694474 | -1.21911 | 0.53478  |
| WWP1       | 0.842811 | 0.027256 | 2.692006 | -1.22067 | 0.530223 |
| VAR5       | 0.842811 | 0.027277 | 2.691521 | -1.22097 | 0.218868 |
| RHOV       | 0.842811 | 0.027376 | 2.68918  | -1.22245 | 0.326228 |
| SERF2      | 0.842811 | 0.027458 | 2.68725  | -1.22367 | 0.435193 |
| HIPK2      | 0.842811 | 0.027465 | 2.687094 | -1.22377 | 0.403838 |
| PDCD2L     | 0.842811 | 0.027544 | 2.685242 | -1.22494 | 0.294791 |
| LOC498222  | 0.842811 | 0.02781  | 2.67906  | -1.22886 | 1.925354 |
| RT1-S3     | 0.842811 | 0.027847 | 2.678194 | -1.22941 | 0.402165 |
| OCRL       | 0.842811 | 0.027883 | 2.677365 | -1.22993 | 0.760263 |
| MPZL2      | 0.842811 | 0.027934 | 2.676203 | -1.23067 | 1.036685 |
| GPM6A      | 0.842811 | 0.027986 | 2.674997 | -1.23143 | 0.373592 |
| TSC22D2    | 0.842811 | 0.028101 | 2.672366 | -1.2331  | 0.379948 |
| LPPR2      | 0.842811 | 0.028126 | 2.671795 | -1.23346 | 0.247116 |
| ZFP36L1    | 0.842811 | 0.028282 | 2.66824  | -1.23572 | 0.566367 |
| DDA1       | 0.842811 | 0.028366 | 2.666317 | -1.23694 | 0.446421 |
| CDV3       | 0.842811 | 0.028422 | 2.665054 | -1.23774 | 0.444294 |
| RADIL      | 0.842811 | 0.028473 | 2.663913 | -1.23847 | 0.179909 |
| IFIT3      | 0.842811 | 0.028498 | 2.663345 | -1.23883 | 0.265461 |
| ZFP36      | 0.842811 | 0.028517 | 2.662917 | -1.2391  | 0.435127 |
| PLSCR3     | 0.842811 | 0.028537 | 2.662468 | -1.23939 | 0.360259 |
| ETV1       | 0.842811 | 0.02856  | 2.661954 | -1.23971 | 0.751343 |
| MAP3K4     | 0.842811 | 0.028623 | 2.660525 | -1.24062 | 0.345762 |
| LURAP1     | 0.842811 | 0.028958 | 2.653053 | -1.24537 | 0.372879 |
| PLCD1      | 0.842811 | 0.028968 | 2.652827 | -1.24552 | 0.607131 |
| HAUS7      | 0.842811 | 0.02897  | 2.652793 | -1.24554 | 0.456326 |
| TPPP3      | 0.842811 | 0.029066 | 2.650649 | -1.2469  | 1.055032 |
| RGD1309079 | 0.842811 | 0.029067 | 2.65064  | -1.24691 | 0.465716 |
| MMGT1      | 0.842811 | 0.029197 | 2.647773 | -1.24874 | 0.402575 |
| PPP2R5C    | 0.842811 | 0.029249 | 2.646624 | -1.24947 | 0.243393 |
| AIMP1      | 0.842811 | 0.029282 | 2.6459   | -1.24993 | 0.360615 |
| PLAC9      | 0.842811 | 0.029316 | 2.645155 | -1.2504  | 0.855428 |
| HSD11B1    | 0.842811 | 0.029363 | 2.644135 | -1.25106 | 0.591083 |
| DDX25      | 0.842811 | 0.029529 | 2.640504 | -1.25337 | 0.23067  |
| RGL2       | 0.842811 | 0.029574 | 2.639537 | -1.25399 | 0.321841 |
| SNN        | 0.842811 | 0.02964  | 2.638087 | -1.25491 | 0.402389 |

|           |          |          |          |          |          |
|-----------|----------|----------|----------|----------|----------|
| PCBP3     | 0.842811 | 0.029652 | 2.637825 | -1.25508 | 0.642994 |
| JOSD2     | 0.842811 | 0.029682 | 2.637188 | -1.25549 | 0.502182 |
| TPP1      | 0.842811 | 0.029684 | 2.63715  | -1.25551 | 0.390891 |
| CEP83     | 0.842811 | 0.029716 | 2.636439 | -1.25597 | 0.310011 |
| OASL      | 0.842811 | 0.029738 | 2.635966 | -1.25627 | 0.211798 |
| WISP2     | 0.842811 | 0.029764 | 2.635423 | -1.25661 | 0.328359 |
| HEATR6    | 0.842811 | 0.029863 | 2.633287 | -1.25798 | 0.189394 |
| CHORDC1   | 0.842811 | 0.029967 | 2.631045 | -1.25941 | 0.517883 |
| MYH10     | 0.842811 | 0.030017 | 2.629969 | -1.2601  | 0.308337 |
| F3        | 0.842811 | 0.03022  | 2.625654 | -1.26286 | 0.659726 |
| SLC35E3   | 0.842811 | 0.030242 | 2.625185 | -1.26316 | 0.447993 |
| KARS      | 0.842811 | 0.030282 | 2.624329 | -1.26371 | 0.409674 |
| MINOS1    | 0.842811 | 0.030361 | 2.622657 | -1.26478 | 0.343617 |
| RUFY3     | 0.842811 | 0.030364 | 2.622587 | -1.26482 | 0.310563 |
| PFDN6     | 0.842811 | 0.030407 | 2.621679 | -1.2654  | 0.400502 |
| USP18     | 0.842811 | 0.0306   | 2.617631 | -1.268   | 0.634263 |
| AP2M1     | 0.842811 | 0.03062  | 2.617201 | -1.26827 | 0.352231 |
| FRMD8     | 0.842811 | 0.030666 | 2.616247 | -1.26888 | 0.432951 |
| CLN3      | 0.842811 | 0.030671 | 2.616131 | -1.26896 | 0.657523 |
| DUSP7     | 0.842811 | 0.030774 | 2.613984 | -1.27033 | 0.749823 |
| JUP       | 0.842811 | 0.030905 | 2.61126  | -1.27208 | 0.595097 |
| QDPR      | 0.842811 | 0.031023 | 2.608809 | -1.27365 | 0.338605 |
| PSMD12    | 0.842811 | 0.031037 | 2.608536 | -1.27383 | 0.394775 |
| IFI35     | 0.842811 | 0.031038 | 2.608504 | -1.27385 | 0.334152 |
| XPNPEP3   | 0.842811 | 0.031163 | 2.605926 | -1.2755  | 0.239351 |
| LOC497940 | 0.842811 | 0.031185 | 2.60548  | -1.27579 | 0.244166 |
| YBX3      | 0.842811 | 0.031255 | 2.604045 | -1.27671 | 0.707486 |
| FOSL2     | 0.842811 | 0.031289 | 2.603341 | -1.27716 | 1.00317  |
| NUMBL     | 0.842811 | 0.031344 | 2.60221  | -1.27789 | 0.50792  |
| ATXN1     | 0.842811 | 0.031596 | 2.597083 | -1.28119 | 0.432186 |
| LHFPL2    | 0.842811 | 0.031621 | 2.596564 | -1.28152 | 1.314312 |
| MSANTD4   | 0.842811 | 0.031678 | 2.595422 | -1.28225 | 0.281327 |
| MXD1      | 0.842811 | 0.031687 | 2.59523  | -1.28238 | 0.386143 |
| PATE4     | 0.842811 | 0.031932 | 2.590293 | -1.28556 | 2.576225 |
| BACH1     | 0.842811 | 0.031963 | 2.589665 | -1.28596 | 0.258813 |
| ATP5H     | 0.842811 | 0.032051 | 2.587903 | -1.28709 | 0.53881  |
| CAPN2     | 0.842811 | 0.032119 | 2.586535 | -1.28798 | 0.532564 |
| IFT80     | 0.842811 | 0.032251 | 2.583925 | -1.28966 | 0.296201 |
| CLEC2G    | 0.842811 | 0.032381 | 2.581342 | -1.29132 | 0.833793 |
| CAB39     | 0.842811 | 0.032475 | 2.579476 | -1.29253 | 0.435278 |
| EFCAB14   | 0.842811 | 0.032505 | 2.578894 | -1.2929  | 0.288077 |
| FDX1L     | 0.842811 | 0.032692 | 2.575201 | -1.29528 | 0.332044 |
| CTSF      | 0.842811 | 0.032833 | 2.572447 | -1.29706 | 0.513788 |
| TMX4      | 0.842811 | 0.032863 | 2.57187  | -1.29743 | 0.374643 |
| AARSD1    | 0.842811 | 0.032901 | 2.571114 | -1.29792 | 0.269381 |
| WNT5B     | 0.842811 | 0.032973 | 2.569726 | -1.29882 | 0.28159  |
| AKAP7     | 0.842811 | 0.033021 | 2.568797 | -1.29942 | 0.462018 |

|            |          |          |          |          |          |
|------------|----------|----------|----------|----------|----------|
| UBE2G2     | 0.842811 | 0.033037 | 2.568477 | -1.29963 | 0.379109 |
| BAG1       | 0.842811 | 0.033069 | 2.567863 | -1.30002 | 0.811149 |
| CFH        | 0.842811 | 0.033189 | 2.565531 | -1.30153 | 0.698979 |
| MAP2K4     | 0.842811 | 0.033254 | 2.564286 | -1.30234 | 0.504857 |
| FUNDC2     | 0.842811 | 0.033277 | 2.563834 | -1.30263 | 0.767354 |
| RGD1311703 | 0.842811 | 0.033323 | 2.562954 | -1.3032  | 0.362718 |
| TBC1D24    | 0.842811 | 0.033326 | 2.562892 | -1.30324 | 0.234877 |
| NR3C2      | 0.842811 | 0.033331 | 2.562806 | -1.30329 | 0.971477 |
| MAFF       | 0.842811 | 0.03345  | 2.560519 | -1.30477 | 0.352906 |
| NFIC       | 0.842811 | 0.033607 | 2.55751  | -1.30672 | 0.715318 |
| HFE        | 0.842811 | 0.033762 | 2.554563 | -1.30863 | 0.429724 |
| MED21      | 0.842811 | 0.033959 | 2.550847 | -1.31104 | 0.418895 |
| PPM1K      | 0.842811 | 0.034135 | 2.547532 | -1.31319 | 0.28907  |
| MAPRE3     | 0.842811 | 0.034345 | 2.543594 | -1.31574 | 0.823803 |
| RND3       | 0.842811 | 0.03437  | 2.543139 | -1.31604 | 0.648465 |
| TMEM184B   | 0.842811 | 0.034388 | 2.542798 | -1.31626 | 0.239648 |
| PCDHGA3    | 0.842811 | 0.034489 | 2.540922 | -1.31747 | 0.188035 |
| MAP3K1     | 0.842811 | 0.034578 | 2.539265 | -1.31855 | 0.21299  |
| NDUFA4     | 0.842811 | 0.034611 | 2.538665 | -1.31894 | 0.357499 |
| DUSP10     | 0.842811 | 0.034632 | 2.538265 | -1.3192  | 1.424033 |
| DUSP18     | 0.842811 | 0.034811 | 2.534971 | -1.32134 | 0.292119 |
| DOC2A      | 0.842811 | 0.03492  | 2.532965 | -1.32264 | 0.182906 |
| RFK        | 0.842811 | 0.035175 | 2.528307 | -1.32567 | 0.320195 |
| KLHDC8B    | 0.842811 | 0.035242 | 2.527095 | -1.32646 | 0.698807 |
| EIF3J      | 0.842811 | 0.03546  | 2.523131 | -1.32904 | 0.46193  |
| TMED1      | 0.842811 | 0.035473 | 2.522906 | -1.32919 | 0.378391 |
| RANBP10    | 0.842811 | 0.035478 | 2.522809 | -1.32925 | 0.18917  |
| TPT1       | 0.842811 | 0.035565 | 2.521251 | -1.33027 | 0.386468 |
| TAF12      | 0.842811 | 0.035598 | 2.520652 | -1.33066 | 0.461849 |
| ADGRL3     | 0.842811 | 0.035631 | 2.520057 | -1.33104 | 0.39936  |
| ARHGEF12   | 0.842811 | 0.035649 | 2.519741 | -1.33125 | 0.252574 |
| NRD1       | 0.842811 | 0.035671 | 2.519348 | -1.33151 | 0.342821 |
| PSMB7      | 0.842811 | 0.035679 | 2.519198 | -1.3316  | 0.465761 |
| OAS3       | 0.842811 | 0.035823 | 2.516621 | -1.33328 | 0.154135 |
| SZRD1      | 0.842811 | 0.035826 | 2.516557 | -1.33332 | 0.246311 |
| SLC35A4    | 0.842811 | 0.035975 | 2.513915 | -1.33505 | 0.275571 |
| STUB1      | 0.842811 | 0.036162 | 2.510586 | -1.33722 | 0.336675 |
| ATF3       | 0.842811 | 0.036182 | 2.51024  | -1.33744 | 0.796414 |
| SOCS6      | 0.842811 | 0.036295 | 2.508233 | -1.33875 | 0.332541 |
| DENND5A    | 0.842811 | 0.036428 | 2.505907 | -1.34027 | 0.37471  |
| VPS28      | 0.842811 | 0.036483 | 2.504935 | -1.34091 | 0.340617 |
| GIF        | 0.842811 | 0.036509 | 2.504481 | -1.3412  | 0.145299 |
| GAA        | 0.842811 | 0.036612 | 2.502674 | -1.34238 | 0.308653 |
| GKAP1      | 0.842811 | 0.036665 | 2.50175  | -1.34299 | 0.276522 |
| LACTB2     | 0.842811 | 0.036682 | 2.501459 | -1.34318 | 0.556483 |
| ATP5J2     | 0.842811 | 0.036805 | 2.499302 | -1.34459 | 0.491517 |
| COPS7A     | 0.842811 | 0.036862 | 2.498315 | -1.34523 | 0.30395  |

|            |          |          |          |          |          |          |
|------------|----------|----------|----------|----------|----------|----------|
| MOGAT1     | 0.842811 | 0.036934 | 2.497075 | -1.34604 | 0.123428 |          |
| EIF4G3     | 0.842811 | 0.036984 | 2.496211 | -1.34661 | 0.282125 |          |
| SGTB       | 0.842811 | 0.037075 | 2.494631 | -1.34764 | 0.639658 |          |
| SOAT1      | 0.842811 | 0.037113 | 2.493983 | -1.34806 | 0.593258 |          |
| LAMB3      | 0.842811 | 0.037218 | 2.492165 | -1.34925 | 0.338946 |          |
| ALKBH5     | 0.842811 | 0.037372 | 2.489535 | -1.35097 | 0.339146 |          |
| CCPG1OS    | 0.842811 | 0.037485 | 2.487589 | -1.35225 | 0.479602 |          |
| HOXD9      | 0.842811 | 0.037536 | 2.486725 | -1.35281 | 0.45618  |          |
| POLB       | 0.842811 | 0.037662 | 2.484584 | -1.35421 | 0.238686 |          |
| DNM1       | 0.842811 | 0.037886 | 2.480795 | -1.3567  | 0.63221  |          |
| WFS1       | 0.842811 | 0.0379   | 2.480559 | -1.35685 | 0.354009 |          |
| PARD3      | 0.842811 | 0.037936 | 2.479937 | -1.35726 | 0.539401 |          |
| RGL1       | 0.842811 | 0.03808  | 2.477515 | -1.35885 | 0.551615 |          |
| HRAS       | 0.842811 | 0.038325 | 2.473419 | -1.36153 | 0.557533 |          |
| FAM134B    | 0.842811 | 0.038351 | 2.472979 | -1.36182 | 0.857523 |          |
| SLC35B4    | 0.842811 | 0.038358 | 2.472877 | -1.36189 | 0.222994 |          |
| IGFBP4     | 0.842811 | 0.038548 | 2.469715 | -1.36396 | 0.612847 |          |
| CLMN       | 0.842811 | 0.038551 | 2.469656 | -1.364   | 0.58108  |          |
| AIP        | 0.842811 | 0.038643 | 2.468143 | -1.365   | 0.375066 |          |
| NUP85      | 0.842811 | 0.038735 | 2.466619 | -1.366   | 0.270744 |          |
| TRAK2      | 0.842811 | 0.038906 | 2.463791 | -1.36786 | 0.571848 |          |
| POLR3K     | 0.842811 | 0.039019 | 2.461946 | -1.36907 | 0.434592 |          |
| RGD1560394 | 0.842811 | 0.039021 | 2.461905 | -1.36909 | 0.233588 |          |
| HMGCS1     | 0.842811 | 0.03905  | 2.461441 | -1.3694  | 1.547738 |          |
| FAM102B    | 0.842811 | 0.039152 | 2.45977  | -1.3705  | 0.321964 |          |
| TNFSF12    | 0.842811 | 0.03931  | 2.457186 | -1.3722  | 0.51537  |          |
| PAM16      | 0.842811 | 0.039351 | 2.45652  | -1.37263 | 0.363588 |          |
| YPEL3      | 0.842811 | 0.039403 | 2.455679 | -1.37319 | 0.491264 |          |
| MID1       | 0.842811 | 0.039434 | 2.455172 | -1.37352 | 1.082293 |          |
| PCLO       | 0.842811 | 0.0395   | 2.454105 | -1.37422 | 0.209556 |          |
|            | 5-Mar    | 0.842811 | 0.03951  | 2.453942 | -1.37433 | 0.230427 |
| CHRD2      | 0.842811 | 0.039538 | 2.453494 | -1.37463 | 0.316145 |          |
| TSPAN3     | 0.842811 | 0.039615 | 2.452246 | -1.37545 | 0.599724 |          |
| BMI1       | 0.842811 | 0.039653 | 2.45163  | -1.37585 | 0.390046 |          |
| RALBP1     | 0.842811 | 0.039671 | 2.451341 | -1.37604 | 0.373015 |          |
| CELF2      | 0.842811 | 0.0397   | 2.450874 | -1.37635 | 0.442525 |          |
| DTX4       | 0.842811 | 0.039764 | 2.449849 | -1.37702 | 0.45078  |          |
| CAPZA2     | 0.842811 | 0.039834 | 2.448719 | -1.37777 | 0.461023 |          |
| SPRYD7     | 0.842811 | 0.039864 | 2.448244 | -1.37808 | 0.584203 |          |
| TOMM40L    | 0.842811 | 0.039867 | 2.448188 | -1.37812 | 0.519849 |          |
| U2AF1L4    | 0.842811 | 0.039917 | 2.447391 | -1.37864 | 0.330584 |          |
| THSD7A     | 0.842811 | 0.039969 | 2.446557 | -1.37919 | 0.485152 |          |
| ADAMTS3    | 0.842811 | 0.040053 | 2.445217 | -1.38008 | 0.168651 |          |
| RTP4       | 0.842811 | 0.040059 | 2.445121 | -1.38014 | 0.359422 |          |
| SNRPC      | 0.842811 | 0.040065 | 2.445027 | -1.3802  | 0.244217 |          |
| PRIMA1     | 0.842811 | 0.040322 | 2.440945 | -1.38289 | 0.451625 |          |
| CLN8       | 0.842811 | 0.040527 | 2.437691 | -1.38504 | 0.362911 |          |

|            |          |          |          |          |          |
|------------|----------|----------|----------|----------|----------|
| LRRC58     | 0.842811 | 0.040642 | 2.435887 | -1.38623 | 0.289197 |
| ZBTB4      | 0.842811 | 0.040685 | 2.435205 | -1.38668 | 0.28533  |
| PLEC       | 0.842811 | 0.04073  | 2.434508 | -1.38714 | 0.770282 |
| R3HDM4     | 0.842811 | 0.040997 | 2.430321 | -1.3899  | 0.221685 |
| PLK3       | 0.842811 | 0.041082 | 2.429004 | -1.39077 | 0.327637 |
| MST1R      | 0.842811 | 0.041127 | 2.428306 | -1.39123 | 0.251491 |
| TUFM       | 0.842811 | 0.041178 | 2.427513 | -1.39175 | 0.431033 |
| PCYT1A     | 0.842811 | 0.041252 | 2.426369 | -1.39251 | 0.526566 |
| PPP1R15A   | 0.842811 | 0.041265 | 2.426161 | -1.39265 | 0.388174 |
| RAB10      | 0.842811 | 0.041409 | 2.423941 | -1.39411 | 0.745416 |
| TIMM44     | 0.842811 | 0.041417 | 2.423806 | -1.3942  | 0.296442 |
| TSPYL1     | 0.842811 | 0.041762 | 2.418515 | -1.3977  | 0.274823 |
| ANXA1      | 0.842811 | 0.041828 | 2.417498 | -1.39837 | 0.698128 |
| LOC302022  | 0.842811 | 0.04193  | 2.415941 | -1.3994  | 0.641769 |
| PKNOX1     | 0.842811 | 0.04211  | 2.413205 | -1.40121 | 0.486432 |
| RB1CC1     | 0.842811 | 0.042186 | 2.412054 | -1.40197 | 0.295009 |
| ZFP667     | 0.842811 | 0.042307 | 2.410225 | -1.40318 | 0.602203 |
| RCAN1      | 0.842811 | 0.042493 | 2.407422 | -1.40504 | 0.683584 |
| SERINC1    | 0.842811 | 0.042532 | 2.406837 | -1.40543 | 0.416023 |
| AK4        | 0.842811 | 0.042726 | 2.403916 | -1.40736 | 0.410596 |
| CMPK2      | 0.842811 | 0.042818 | 2.402543 | -1.40827 | 0.295587 |
| ATP5D      | 0.842811 | 0.042847 | 2.402118 | -1.40855 | 0.580513 |
| KCNN1      | 0.842811 | 0.042886 | 2.40154  | -1.40894 | 0.3035   |
| MTRF1L     | 0.842811 | 0.042936 | 2.400784 | -1.40944 | 0.223158 |
| CCK        | 0.842811 | 0.042989 | 2.399998 | -1.40996 | 0.520133 |
| SRXN1      | 0.842811 | 0.04304  | 2.399242 | -1.41046 | 0.791915 |
| DFNA5      | 0.842811 | 0.043137 | 2.397811 | -1.41141 | 0.169362 |
| LMF2       | 0.842811 | 0.043153 | 2.397572 | -1.41157 | 0.292095 |
| NUTF2      | 0.842811 | 0.043281 | 2.395681 | -1.41282 | 0.329801 |
| BRD3       | 0.842811 | 0.043407 | 2.393815 | -1.41406 | 0.243521 |
| CLDN6      | 0.842811 | 0.043549 | 2.391737 | -1.41544 | 0.927322 |
| TMSB4X     | 0.842811 | 0.043655 | 2.390175 | -1.41648 | 0.593378 |
| RAB26      | 0.842811 | 0.043694 | 2.389604 | -1.41685 | 1.643004 |
| MAPKAPK2   | 0.842811 | 0.043766 | 2.388556 | -1.41755 | 0.502409 |
| CCT8       | 0.842811 | 0.043842 | 2.387448 | -1.41829 | 0.341133 |
| ARL5A      | 0.842811 | 0.044002 | 2.385123 | -1.41983 | 0.430674 |
| KIAA0408   | 0.842811 | 0.044013 | 2.384962 | -1.41994 | 0.939177 |
| RAB22A     | 0.842811 | 0.044106 | 2.383615 | -1.42083 | 0.144346 |
| FBXO27     | 0.842811 | 0.044108 | 2.383579 | -1.42085 | 0.27695  |
| FGF14      | 0.842811 | 0.044169 | 2.382704 | -1.42144 | 0.406552 |
| COX19      | 0.842811 | 0.044182 | 2.382504 | -1.42157 | 0.389261 |
| ZFP483     | 0.842811 | 0.044264 | 2.381321 | -1.42236 | 1.223086 |
| GADD45GIP1 | 0.842811 | 0.044399 | 2.379377 | -1.42365 | 0.287653 |
| IFNGR2     | 0.842811 | 0.044586 | 2.376688 | -1.42543 | 0.487633 |
| STARD13    | 0.842811 | 0.044654 | 2.375724 | -1.42608 | 0.282666 |
| PTPN11     | 0.842811 | 0.044992 | 2.370905 | -1.42928 | 0.353969 |
| MRPL14     | 0.842811 | 0.045241 | 2.367381 | -1.43163 | 0.337593 |

|           |          |          |          |          |          |
|-----------|----------|----------|----------|----------|----------|
| POLR2M    | 0.842811 | 0.045376 | 2.36547  | -1.4329  | 0.405812 |
| RUNX1T1   | 0.842811 | 0.04543  | 2.36471  | -1.43341 | 0.310627 |
| ERAL1     | 0.842811 | 0.045457 | 2.364327 | -1.43366 | 0.278164 |
| BST2      | 0.842811 | 0.045597 | 2.362373 | -1.43496 | 0.967844 |
| FOXO4     | 0.842811 | 0.045615 | 2.362116 | -1.43513 | 0.581073 |
| DCUN1D1   | 0.842811 | 0.045646 | 2.361679 | -1.43542 | 0.249842 |
| NDUFB4    | 0.842811 | 0.04567  | 2.361352 | -1.43564 | 0.546396 |
| CAMK2D    | 0.842811 | 0.045705 | 2.360858 | -1.43597 | 0.529661 |
| ARIH2     | 0.842811 | 0.045712 | 2.360764 | -1.43603 | 0.303206 |
| PCDHGA2   | 0.842811 | 0.045828 | 2.359139 | -1.43712 | 0.231252 |
| TIMM8B    | 0.842811 | 0.045871 | 2.358538 | -1.43752 | 0.360453 |
| CABP7     | 0.842811 | 0.046128 | 2.354974 | -1.43989 | 0.160308 |
| CCDC124   | 0.842811 | 0.046296 | 2.352643 | -1.44145 | 0.442371 |
| SRGAP2    | 0.842811 | 0.046306 | 2.352509 | -1.44154 | 0.27747  |
| CAR5B     | 0.842811 | 0.046641 | 2.347901 | -1.44461 | 0.694504 |
| FXYD3     | 0.842811 | 0.046687 | 2.347273 | -1.44503 | 1.669211 |
| PSMB5     | 0.842811 | 0.04673  | 2.346681 | -1.44542 | 0.401099 |
| HR        | 0.842811 | 0.046742 | 2.346523 | -1.44553 | 0.27009  |
| NOMO1     | 0.842811 | 0.046768 | 2.346168 | -1.44577 | 0.619658 |
| ABHD3     | 0.842811 | 0.046858 | 2.344931 | -1.44659 | 0.624771 |
| DHCR24    | 0.842811 | 0.046939 | 2.343837 | -1.44732 | 1.647705 |
| SLC12A2   | 0.842811 | 0.046978 | 2.343298 | -1.44768 | 1.520911 |
| RC3H2     | 0.842811 | 0.047078 | 2.341947 | -1.44858 | 0.202652 |
| TLE4      | 0.842811 | 0.047119 | 2.341392 | -1.44895 | 0.287702 |
| VEZT      | 0.842811 | 0.047443 | 2.337016 | -1.45188 | 0.454521 |
| MRPL3     | 0.842811 | 0.04746  | 2.336784 | -1.45203 | 0.303725 |
| LOC688459 | 0.842811 | 0.047531 | 2.335827 | -1.45267 | 0.206809 |
| DAB2IP    | 0.842811 | 0.047556 | 2.335489 | -1.4529  | 0.514204 |
| BAP1      | 0.842811 | 0.047568 | 2.335333 | -1.453   | 0.438902 |
| CSNK1E    | 0.842811 | 0.047608 | 2.334792 | -1.45336 | 0.481801 |
| LGI3      | 0.842811 | 0.047767 | 2.332657 | -1.45479 | 0.391017 |
| ENTPD3    | 0.842811 | 0.047834 | 2.331769 | -1.45538 | 0.384823 |
| CCDC117   | 0.842811 | 0.04784  | 2.33169  | -1.45544 | 0.385875 |
| PLEKHA1   | 0.842811 | 0.047844 | 2.331636 | -1.45547 | 0.321594 |
| FXYD7     | 0.842811 | 0.048073 | 2.328584 | -1.45751 | 0.794515 |
| ZFP382    | 0.842811 | 0.048086 | 2.328415 | -1.45763 | 0.238349 |
| EEA1      | 0.842811 | 0.048087 | 2.328398 | -1.45764 | 0.421966 |
| TREX1     | 0.842811 | 0.048229 | 2.326513 | -1.4589  | 0.271795 |
| LGMN      | 0.842811 | 0.048255 | 2.326168 | -1.45913 | 0.428028 |
| LSM2      | 0.842811 | 0.048277 | 2.325874 | -1.45933 | 0.463714 |
| MKNK2     | 0.842811 | 0.048281 | 2.325821 | -1.45936 | 0.674161 |
| RHOB      | 0.842811 | 0.048533 | 2.322495 | -1.46159 | 0.375664 |
| NDST1     | 0.842811 | 0.048633 | 2.321183 | -1.46246 | 0.381699 |
| ABCA5     | 0.842811 | 0.048721 | 2.320034 | -1.46323 | 0.320287 |
| TMEM50B   | 0.842811 | 0.048796 | 2.319042 | -1.4639  | 0.34654  |
| CNP       | 0.842811 | 0.048882 | 2.317916 | -1.46465 | 0.556017 |
| GSTP1     | 0.842811 | 0.048928 | 2.317315 | -1.46505 | 0.337848 |

|           |          |          |          |          |          |
|-----------|----------|----------|----------|----------|----------|
| CD63      | 0.842811 | 0.048975 | 2.316708 | -1.46546 | 0.706548 |
| ZFP39     | 0.842811 | 0.048979 | 2.316653 | -1.4655  | 0.175107 |
| IRX3      | 0.842811 | 0.049022 | 2.316089 | -1.46588 | 0.762697 |
| JAK1      | 0.842811 | 0.049026 | 2.316043 | -1.46591 | 0.279465 |
| APLP1     | 0.842811 | 0.049104 | 2.31503  | -1.46658 | 0.653312 |
| WDR44     | 0.842811 | 0.049192 | 2.313876 | -1.46736 | 0.595857 |
| RGS2      | 0.842811 | 0.049291 | 2.312603 | -1.46821 | 1.182613 |
| LOC686120 | 0.842811 | 0.049316 | 2.312275 | -1.46843 | 1.077243 |
| TPM3      | 0.842811 | 0.049364 | 2.311655 | -1.46885 | 0.350325 |
| AKAP1     | 0.842811 | 0.049418 | 2.310955 | -1.46931 | 0.832188 |
| ACKR2     | 0.842811 | 0.049433 | 2.310765 | -1.46944 | 0.364701 |
| NMI       | 0.842811 | 0.049437 | 2.310703 | -1.46948 | 0.391397 |
| LSM4      | 0.842811 | 0.049668 | 2.307735 | -1.47147 | 0.384068 |
| ARNTL     | 0.842811 | 0.049746 | 2.306721 | -1.47215 | 0.259467 |
| VAPA      | 0.842811 | 0.049867 | 2.305171 | -1.47319 | 0.266034 |
| PNRC1     | 0.842811 | 0.049871 | 2.30512  | -1.47323 | 0.397234 |
| FOXJ3     | 0.842811 | 0.049918 | 2.304518 | -1.47363 | 0.17542  |
| LRP5      | 0.842811 | 0.049974 | 2.303801 | -1.47411 | 0.20885  |

| day1_DEG_0.05_EvsISOdown | adj.P.Val | P.Value  | t        | B        | logFC    |
|--------------------------|-----------|----------|----------|----------|----------|
| MIR27B                   | 0.191797  | 1.30E-05 | -70.9208 | -1.60033 | -6.51269 |
| MFS2A                    | 1         | 0.000415 | -20.3442 | -1.60653 | -4.0597  |
| GATA3                    | 1         | 0.000467 | -19.4936 | -1.60713 | -4.42648 |
| ALDOC                    | 1         | 0.00078  | -16.1938 | -1.61039 | -2.01466 |
| SMPX                     | 1         | 0.001063 | -14.4719 | -1.61302 | -4.94259 |
| LRCOL1                   | 1         | 0.001206 | -13.8198 | -1.61428 | -1.78931 |
| MGC116197                | 1         | 0.001462 | -12.8849 | -1.61641 | -1.23588 |
| FAXC                     | 1         | 0.001488 | -12.8013 | -1.61663 | -1.15758 |
| CHRM2                    | 1         | 0.0019   | -11.7088 | -1.61984 | -2.28631 |
| DES2                     | 1         | 0.002733 | -10.2498 | -1.62576 | -0.89375 |
| RBFOX3                   | 1         | 0.002802 | -10.1557 | -1.62622 | -1.10228 |
| RUNDC3A                  | 1         | 0.002903 | -10.0245 | -1.6269  | -0.7428  |
| CACNA1A                  | 1         | 0.002985 | -9.92242 | -1.62744 | -0.82051 |
| SRY                      | 1         | 0.00306  | -9.83219 | -1.62793 | -0.75092 |
| POPDC2                   | 1         | 0.003383 | -9.4758  | -1.63001 | -0.89079 |
| GGT1                     | 1         | 0.003469 | -9.38838 | -1.63055 | -2.37629 |
| ISL1                     | 1         | 0.004223 | -8.73066 | -1.63515 | -0.91063 |
| NPM1                     | 1         | 0.004289 | -8.6811  | -1.63554 | -0.71882 |
| LOC500877                | 1         | 0.004457 | -8.55801 | -1.63653 | -1.1406  |
| TFAP2C                   | 1         | 0.004483 | -8.54001 | -1.63668 | -0.75096 |
| SGK1                     | 1         | 0.00462  | -8.44513 | -1.63747 | -2.83336 |
| LOC100911367             | 1         | 0.004712 | -8.38332 | -1.638   | -1.56151 |
| BRSK1                    | 1         | 0.004906 | -8.25903 | -1.6391  | -0.76551 |
| ITGB8                    | 1         | 0.005072 | -8.15782 | -1.64004 | -1.32381 |
| RYR2                     | 1         | 0.005103 | -8.13923 | -1.64021 | -0.76908 |
| FGF14                    | 1         | 0.005154 | -8.1091  | -1.6405  | -0.61047 |
| MYCL                     | 1         | 0.005471 | -7.93119 | -1.64225 | -1.91107 |
| ADAMTS19                 | 1         | 0.005631 | -7.84629 | -1.64312 | -2.16779 |
| ABLIM2                   | 1         | 0.005853 | -7.7341  | -1.64432 | -0.64698 |
| CTNND2                   | 1         | 0.005992 | -7.66647 | -1.64506 | -0.68523 |
| HIST3H2BA                | 1         | 0.006057 | -7.63582 | -1.6454  | -0.57402 |
| NCS1                     | 1         | 0.006148 | -7.59369 | -1.64588 | -0.90774 |
| FLNC                     | 1         | 0.006313 | -7.5187  | -1.64675 | -2.05221 |
| ZWINT                    | 1         | 0.006342 | -7.50607 | -1.6469  | -3.12516 |
| CD52                     | 1         | 0.006549 | -7.41625 | -1.64798 | -8.38043 |
| TP63                     | 1         | 0.006867 | -7.28601 | -1.64961 | -1.08095 |
| CLDN17                   | 1         | 0.007012 | -7.22893 | -1.65035 | -0.77676 |
| GDF7                     | 1         | 0.007196 | -7.15912 | -1.65128 | -2.38954 |
| RGD1305928               | 1         | 0.007264 | -7.13397 | -1.65162 | -1.83326 |
| TPM1                     | 1         | 0.007316 | -7.115   | -1.65188 | -1.94369 |
| KERA                     | 1         | 0.007552 | -7.03065 | -1.65305 | -0.73036 |
| HIST1H2AN                | 1         | 0.007555 | -7.02952 | -1.65307 | -0.66159 |
| LOC100366054             | 1         | 0.007891 | -6.91569 | -1.65472 | -0.57911 |
| FGF9                     | 1         | 0.007941 | -6.89918 | -1.65496 | -0.61347 |
| PCDH9                    | 1         | 0.00832  | -6.77918 | -1.65679 | -0.54382 |
| PPP1R12A                 | 1         | 0.008681 | -6.67137 | -1.65852 | -1.24888 |

|           |   |          |          |          |          |
|-----------|---|----------|----------|----------|----------|
| WDR92     | 1 | 0.008738 | -6.65496 | -1.65878 | -0.82353 |
| HHIP      | 1 | 0.008848 | -6.6237  | -1.6593  | -1.16209 |
| MYO5B     | 1 | 0.008922 | -6.60287 | -1.65965 | -1.51469 |
| ACTN1     | 1 | 0.009437 | -6.46413 | -1.66205 | -1.292   |
| PACSIN1   | 1 | 0.00948  | -6.45297 | -1.66224 | -0.47426 |
| P2RX2     | 1 | 0.009517 | -6.44346 | -1.66241 | -0.59297 |
| DGKI      | 1 | 0.00989  | -6.35038 | -1.66412 | -0.84144 |
| NRN1      | 1 | 0.010001 | -6.3235  | -1.66462 | -1.94654 |
| CGNL1     | 1 | 0.010321 | -6.24833 | -1.66606 | -1.79198 |
| LRRTM2    | 1 | 0.010414 | -6.22715 | -1.66647 | -0.56459 |
| AMER1     | 1 | 0.010477 | -6.21282 | -1.66676 | -1.1151  |
| CAR14     | 1 | 0.010509 | -6.20571 | -1.6669  | -1.53631 |
| WFDC18    | 1 | 0.010684 | -6.16679 | -1.66767 | -8.70094 |
| PRRT2     | 1 | 0.010756 | -6.15125 | -1.66799 | -0.91339 |
| RIMS1     | 1 | 0.011059 | -6.08639 | -1.66932 | -0.49245 |
| MYOC      | 1 | 0.011171 | -6.06304 | -1.66981 | -1.54413 |
| TENM2     | 1 | 0.011255 | -6.04575 | -1.67018 | -0.62897 |
| NFASC     | 1 | 0.011322 | -6.03218 | -1.67047 | -1.04113 |
| FAM115E   | 1 | 0.011767 | -5.9441  | -1.67239 | -6.62899 |
| CTPS1     | 1 | 0.012095 | -5.88195 | -1.67379 | -0.54643 |
| FGF11     | 1 | 0.012116 | -5.878   | -1.67388 | -0.63258 |
| SEMA4D    | 1 | 0.012323 | -5.84015 | -1.67475 | -0.75543 |
| PLCXD2    | 1 | 0.012599 | -5.7908  | -1.67591 | -0.65917 |
| SYT9      | 1 | 0.012956 | -5.7291  | -1.6774  | -2.45106 |
| PPP1R14C  | 1 | 0.013012 | -5.71962 | -1.67764 | -1.08197 |
| MIR143    | 1 | 0.013135 | -5.69897 | -1.67815 | -7.05645 |
| EME1      | 1 | 0.01316  | -5.69494 | -1.67825 | -0.42802 |
| NIPAL1    | 1 | 0.013201 | -5.6881  | -1.67842 | -2.75925 |
| CPA6      | 1 | 0.013273 | -5.67625 | -1.67871 | -0.77822 |
| PPAP2A    | 1 | 0.013609 | -5.62205 | -1.68009 | -0.73609 |
| IFT57     | 1 | 0.013695 | -5.60843 | -1.68044 | -0.55768 |
| FCGBP     | 1 | 0.013803 | -5.59151 | -1.68088 | -5.92506 |
| LOC498675 | 1 | 0.013848 | -5.5844  | -1.68107 | -0.58719 |
| CNKSR2    | 1 | 0.01385  | -5.58415 | -1.68107 | -0.84017 |
| FOXQ1     | 1 | 0.013888 | -5.57826 | -1.68123 | -1.24597 |
| CCL21     | 1 | 0.014226 | -5.52679 | -1.68259 | -2.9474  |
| ERI2      | 1 | 0.014317 | -5.51325 | -1.68296 | -1.12359 |
| STK26     | 1 | 0.014419 | -5.49822 | -1.68337 | -0.43025 |
| TNFRSF11A | 1 | 0.014453 | -5.49326 | -1.6835  | -0.76291 |
| GOT1      | 1 | 0.014788 | -5.44487 | -1.68484 | -1.3058  |
| SERPINB1A | 1 | 0.014841 | -5.43743 | -1.68505 | -5.83575 |
| DGKG      | 1 | 0.015054 | -5.40746 | -1.68589 | -0.80022 |
| TENM3     | 1 | 0.015085 | -5.40317 | -1.68601 | -0.68636 |
| HAVCR1    | 1 | 0.015556 | -5.3394  | -1.68786 | -5.11319 |
| LMLN      | 1 | 0.015707 | -5.3194  | -1.68845 | -0.60295 |
| HAUS7     | 1 | 0.015791 | -5.3085  | -1.68877 | -0.60199 |
| TUBA8     | 1 | 0.016373 | -5.23448 | -1.69102 | -2.2683  |

|              |   |          |          |          |          |
|--------------|---|----------|----------|----------|----------|
| LOC500124    | 1 | 0.016525 | -5.21573 | -1.6916  | -0.48873 |
| ABCG4        | 1 | 0.016895 | -5.17098 | -1.69301 | -1.5605  |
| EDAR         | 1 | 0.016904 | -5.16993 | -1.69305 | -0.53928 |
| SLC7A5       | 1 | 0.017486 | -5.10224 | -1.69524 | -2.04671 |
| DBIL5        | 1 | 0.017556 | -5.09431 | -1.6955  | -0.53199 |
| CCDC104      | 1 | 0.017738 | -5.07385 | -1.69618 | -0.47526 |
| PLEKHS1      | 1 | 0.018188 | -5.02455 | -1.69785 | -4.05831 |
| LXN          | 1 | 0.018453 | -4.99622 | -1.69883 | -0.93395 |
| ZFP444       | 1 | 0.018486 | -4.9927  | -1.69895 | -0.64679 |
| LPAR3        | 1 | 0.018501 | -4.99113 | -1.69901 | -1.63016 |
| PLCG2        | 1 | 0.018835 | -4.95634 | -1.70023 | -0.98834 |
| ATOH8        | 1 | 0.019412 | -4.89811 | -1.70233 | -1.33935 |
| ANKRD22      | 1 | 0.019622 | -4.87748 | -1.70308 | -3.35398 |
| KLHL29       | 1 | 0.02006  | -4.83535 | -1.70466 | -0.64991 |
| GRIA4        | 1 | 0.020132 | -4.82856 | -1.70491 | -0.60274 |
| WNT6         | 1 | 0.020407 | -4.80288 | -1.70589 | -0.43827 |
| MYH10        | 1 | 0.020408 | -4.80272 | -1.7059  | -0.3895  |
| PRRG2        | 1 | 0.020481 | -4.79599 | -1.70616 | -0.51057 |
| EIF5B        | 1 | 0.020777 | -4.76901 | -1.7072  | -0.47555 |
| NCDN         | 1 | 0.02087  | -4.76061 | -1.70753 | -0.73256 |
| CPD          | 1 | 0.020946 | -4.75384 | -1.7078  | -0.75869 |
| PASK         | 1 | 0.020954 | -4.75309 | -1.70783 | -1.76615 |
| GPSM2        | 1 | 0.021064 | -4.74332 | -1.70821 | -1.26617 |
| LOC100294508 | 1 | 0.02143  | -4.71114 | -1.70949 | -0.44201 |
| ADAM9        | 1 | 0.021617 | -4.69506 | -1.71014 | -1.00592 |
| ADAT2        | 1 | 0.022247 | -4.642   | -1.71233 | -0.73613 |
| LOC690806    | 1 | 0.022328 | -4.63534 | -1.7126  | -0.81943 |
| SLC26A3      | 1 | 0.022456 | -4.6249  | -1.71304 | -1.98796 |
| ITGB1BP2     | 1 | 0.022537 | -4.61829 | -1.71332 | -1.15271 |
| ZFYVE19      | 1 | 0.022809 | -4.59636 | -1.71425 | -0.35666 |
| PRDX6        | 1 | 0.022991 | -4.58191 | -1.71487 | -1.53714 |
| SLC16A3      | 1 | 0.023076 | -4.57517 | -1.71516 | -3.32993 |
| PEX3         | 1 | 0.023251 | -4.56147 | -1.71576 | -0.39635 |
| PGAP1        | 1 | 0.023299 | -4.55779 | -1.71592 | -0.73316 |
| BASP1        | 1 | 0.023416 | -4.54873 | -1.71631 | -2.35043 |
| MYH11        | 1 | 0.023451 | -4.54603 | -1.71643 | -2.69308 |
| BIRC3        | 1 | 0.023554 | -4.53814 | -1.71678 | -1.49719 |
| PRKAR1B      | 1 | 0.023763 | -4.52222 | -1.71748 | -0.9261  |
| MPZ          | 1 | 0.024239 | -4.48665 | -1.71908 | -3.2566  |
| LOC100158225 | 1 | 0.024375 | -4.47664 | -1.71953 | -0.49435 |
| NFXL1        | 1 | 0.024462 | -4.47032 | -1.71982 | -0.94942 |
| APOD         | 1 | 0.024634 | -4.45785 | -1.72039 | -3.03008 |
| TMEM184A     | 1 | 0.025424 | -4.40201 | -1.723   | -1.40756 |
| SLC1A4       | 1 | 0.025539 | -4.39406 | -1.72338 | -0.96744 |
| PLXDC1       | 1 | 0.025555 | -4.39301 | -1.72343 | -0.45203 |
| STAMBPL1     | 1 | 0.025674 | -4.3848  | -1.72382 | -2.3005  |
| ACTG2        | 1 | 0.025946 | -4.36633 | -1.72471 | -2.79537 |

|              |   |          |          |          |          |
|--------------|---|----------|----------|----------|----------|
| PAK3         | 1 | 0.02603  | -4.36068 | -1.72498 | -0.6349  |
| KRT23        | 1 | 0.026055 | -4.35903 | -1.72506 | -1.59544 |
| NRADD        | 1 | 0.026095 | -4.35634 | -1.72519 | -0.51059 |
| LPCAT2       | 1 | 0.026172 | -4.35124 | -1.72544 | -1.46716 |
| IFITM2       | 1 | 0.026291 | -4.34333 | -1.72583 | -0.32352 |
| GOLGA4       | 1 | 0.026294 | -4.34312 | -1.72584 | -0.58394 |
| AKTIP        | 1 | 0.026844 | -4.30723 | -1.72761 | -1.25952 |
| FAM83B       | 1 | 0.027139 | -4.28833 | -1.72856 | -0.81946 |
| DBNDD2       | 1 | 0.027191 | -4.28504 | -1.72872 | -0.85297 |
| ANGPTL3      | 1 | 0.027336 | -4.27591 | -1.72919 | -0.4298  |
| ITGB6        | 1 | 0.027388 | -4.27261 | -1.72935 | -0.68158 |
| NXN          | 1 | 0.027698 | -4.25335 | -1.73034 | -1.02622 |
| DES          | 1 | 0.027789 | -4.2477  | -1.73063 | -2.3298  |
| MMGT2        | 1 | 0.027899 | -4.24096 | -1.73098 | -0.83705 |
| SH3BGR       | 1 | 0.028098 | -4.22884 | -1.73161 | -2.5217  |
| PPM1J        | 1 | 0.028174 | -4.22423 | -1.73185 | -0.69368 |
| PGP          | 1 | 0.0282   | -4.22268 | -1.73193 | -0.82197 |
| CD3EAP       | 1 | 0.028206 | -4.22227 | -1.73195 | -0.39863 |
| H6PD         | 1 | 0.02876  | -4.18927 | -1.73369 | -0.4932  |
| RASL10A      | 1 | 0.028891 | -4.1816  | -1.7341  | -1.41499 |
| MRPS28       | 1 | 0.02891  | -4.18053 | -1.73416 | -0.42178 |
| RNF148       | 1 | 0.029203 | -4.16349 | -1.73508 | -0.55072 |
| BTC          | 1 | 0.029285 | -4.1588  | -1.73533 | -1.04701 |
| LOC100912083 | 1 | 0.029305 | -4.15761 | -1.7354  | -0.59146 |
| ARHGAP26     | 1 | 0.029544 | -4.144   | -1.73614 | -2.064   |
| NEXN         | 1 | 0.029663 | -4.13727 | -1.7365  | -2.0382  |
| FAM83F       | 1 | 0.029699 | -4.13525 | -1.73662 | -1.08384 |
| ZRSR1        | 1 | 0.030064 | -4.11484 | -1.73774 | -0.34063 |
| MGAT5        | 1 | 0.030141 | -4.11057 | -1.73798 | -3.36217 |
| STOX2        | 1 | 0.030301 | -4.10173 | -1.73847 | -0.69986 |
| LENEP        | 1 | 0.030389 | -4.0969  | -1.73874 | -0.46366 |
| MAP1A        | 1 | 0.03052  | -4.08977 | -1.73915 | -1.19473 |
| FEZ1         | 1 | 0.030578 | -4.08661 | -1.73932 | -2.25071 |
| CCL20        | 1 | 0.030655 | -4.08247 | -1.73956 | -0.8675  |
| NAGLT1       | 1 | 0.030873 | -4.07069 | -1.74023 | -0.31977 |
| PKMYT1       | 1 | 0.030887 | -4.06998 | -1.74027 | -0.30643 |
| TPM2         | 1 | 0.031136 | -4.0567  | -1.74103 | -2.95238 |
| NDE1         | 1 | 0.031144 | -4.05627 | -1.74105 | -0.64469 |
| KCNN2        | 1 | 0.031405 | -4.04255 | -1.74184 | -0.36497 |
| PCDHGA1      | 1 | 0.031435 | -4.04098 | -1.74193 | -0.37436 |
| MSX1         | 1 | 0.031554 | -4.03475 | -1.74229 | -0.63614 |
| CLDN19       | 1 | 0.031558 | -4.03454 | -1.74231 | -0.49304 |
| LINGO4       | 1 | 0.031918 | -4.01592 | -1.74339 | -0.91763 |
| PARD6B       | 1 | 0.0323   | -3.9965  | -1.74454 | -0.58123 |
| ASIC2        | 1 | 0.03236  | -3.99346 | -1.74472 | -0.572   |
| VAMP1        | 1 | 0.032458 | -3.98853 | -1.74502 | -0.85777 |
| NPFF         | 1 | 0.032708 | -3.97608 | -1.74576 | -0.69796 |

|              |   |          |          |          |          |
|--------------|---|----------|----------|----------|----------|
| ARL4D        | 1 | 0.032715 | -3.97574 | -1.74578 | -1.98469 |
| F2RL1        | 1 | 0.03275  | -3.97398 | -1.74589 | -0.4518  |
| EARS2        | 1 | 0.032851 | -3.96901 | -1.74619 | -0.37203 |
| MYOCD        | 1 | 0.032936 | -3.96482 | -1.74644 | -1.0578  |
| SORCS1       | 1 | 0.033002 | -3.96157 | -1.74664 | -0.85206 |
| LOC688765    | 1 | 0.033187 | -3.95252 | -1.74719 | -0.3013  |
| CTSE         | 1 | 0.03355  | -3.93495 | -1.74826 | -4.84679 |
| SH3BGRL3     | 1 | 0.033592 | -3.93291 | -1.74839 | -3.87733 |
| GATA2        | 1 | 0.033834 | -3.92138 | -1.7491  | -2.66828 |
| KLRC3        | 1 | 0.033898 | -3.91835 | -1.74929 | -0.51063 |
| FAM110A      | 1 | 0.034293 | -3.89979 | -1.75045 | -0.70595 |
| KRT17        | 1 | 0.034759 | -3.8782  | -1.75181 | -0.85448 |
| PIK3R3       | 1 | 0.035062 | -3.86439 | -1.75269 | -1.71453 |
| PLSCR2       | 1 | 0.0352   | -3.85816 | -1.75309 | -2.37412 |
| ASB2         | 1 | 0.035294 | -3.85391 | -1.75337 | -1.77903 |
| KIF16B       | 1 | 0.03584  | -3.82963 | -1.75495 | -0.34035 |
| PPFIA4       | 1 | 0.035863 | -3.82861 | -1.75501 | -0.28278 |
| CNN1         | 1 | 0.035865 | -3.82855 | -1.75502 | -2.24249 |
| SLC2A12      | 1 | 0.036003 | -3.82247 | -1.75541 | -0.65872 |
| CTNS         | 1 | 0.036085 | -3.8189  | -1.75565 | -0.68196 |
| ACPT         | 1 | 0.036275 | -3.81064 | -1.75619 | -0.2802  |
| SUSD2        | 1 | 0.036528 | -3.79971 | -1.75692 | -1.17575 |
| RPL37A       | 1 | 0.036911 | -3.78337 | -1.75801 | -5.79153 |
| LG14         | 1 | 0.036988 | -3.78011 | -1.75823 | -0.8709  |
| HPGD         | 1 | 0.037081 | -3.77619 | -1.7585  | -5.36049 |
| SLC25A53     | 1 | 0.037085 | -3.77603 | -1.75851 | -0.27761 |
| SMAD9        | 1 | 0.037158 | -3.77293 | -1.75872 | -2.8372  |
| INSC         | 1 | 0.037267 | -3.76836 | -1.75902 | -0.64879 |
| GJB5         | 1 | 0.037318 | -3.76623 | -1.75917 | -0.34904 |
| CAPN1        | 1 | 0.037863 | -3.74367 | -1.76071 | -2.33137 |
| BCL7C        | 1 | 0.037994 | -3.73832 | -1.76108 | -0.76817 |
| DUSP8        | 1 | 0.038228 | -3.7288  | -1.76174 | -0.76603 |
| SLCO4A1      | 1 | 0.038242 | -3.72825 | -1.76178 | -0.29081 |
| YPEL2        | 1 | 0.038286 | -3.72646 | -1.7619  | -0.82547 |
| BMP2         | 1 | 0.038406 | -3.72163 | -1.76224 | -0.84246 |
| PTPN18       | 1 | 0.038624 | -3.71289 | -1.76285 | -2.26129 |
| RAP2B        | 1 | 0.038631 | -3.71263 | -1.76287 | -0.98741 |
| SRI          | 1 | 0.038636 | -3.71239 | -1.76288 | -1.06272 |
| RGD1311863   | 1 | 0.038793 | -3.70616 | -1.76332 | -0.74364 |
| FXVD6        | 1 | 0.038859 | -3.70356 | -1.7635  | -2.05671 |
| LOC102554586 | 1 | 0.03895  | -3.69994 | -1.76376 | -0.84206 |
| DGKB         | 1 | 0.039228 | -3.68902 | -1.76453 | -2.07367 |
| MBNL3        | 1 | 0.039305 | -3.68598 | -1.76475 | -0.90846 |
| RHOV         | 1 | 0.039391 | -3.68264 | -1.76499 | -0.68987 |
| PTPRZ1       | 1 | 0.039459 | -3.68001 | -1.76517 | -0.43678 |
| BCL2L11      | 1 | 0.039463 | -3.67984 | -1.76518 | -0.29324 |
| EGF          | 1 | 0.039609 | -3.67419 | -1.76559 | -3.92411 |

|            |   |          |          |          |          |
|------------|---|----------|----------|----------|----------|
| DLK2       | 1 | 0.040177 | -3.65245 | -1.76716 | -0.76469 |
| FAM3D      | 1 | 0.040383 | -3.64466 | -1.76772 | -4.14478 |
| MASP1      | 1 | 0.040404 | -3.64387 | -1.76778 | -0.84906 |
| SESN3      | 1 | 0.040426 | -3.64305 | -1.76784 | -0.83882 |
| BCO2       | 1 | 0.041077 | -3.61879 | -1.76962 | -0.68382 |
| SERPINB8   | 1 | 0.041146 | -3.61625 | -1.76981 | -2.98993 |
| APBA2      | 1 | 0.041293 | -3.61086 | -1.77021 | -0.70842 |
| GNAZ       | 1 | 0.041606 | -3.59947 | -1.77106 | -0.83617 |
| LEFTY2     | 1 | 0.041855 | -3.59047 | -1.77174 | -0.46775 |
| NUDT1      | 1 | 0.042102 | -3.58163 | -1.77241 | -0.36127 |
| PPFIBP2    | 1 | 0.042526 | -3.56657 | -1.77355 | -2.17296 |
| BANP       | 1 | 0.042591 | -3.5643  | -1.77373 | -0.3338  |
| POLR3B     | 1 | 0.042624 | -3.56315 | -1.77381 | -1.28668 |
| KIF15      | 1 | 0.042883 | -3.55407 | -1.77451 | -1.98748 |
| ZFP385B    | 1 | 0.043684 | -3.52652 | -1.77665 | -0.56695 |
| SYT8       | 1 | 0.043781 | -3.52322 | -1.77691 | -0.33905 |
| EYA4       | 1 | 0.043855 | -3.52071 | -1.77711 | -0.80419 |
| PGM5       | 1 | 0.044011 | -3.51543 | -1.77752 | -2.22941 |
| ADM2       | 1 | 0.044273 | -3.50665 | -1.77821 | -1.07764 |
| FAM60A     | 1 | 0.044317 | -3.50516 | -1.77833 | -0.6588  |
| KRT14      | 1 | 0.044536 | -3.49788 | -1.77891 | -1.26437 |
| CCDC65     | 1 | 0.044588 | -3.49615 | -1.77905 | -0.76023 |
| CLINT1     | 1 | 0.044816 | -3.48863 | -1.77965 | -1.37433 |
| RGD1309036 | 1 | 0.044899 | -3.4859  | -1.77987 | -0.3333  |
| ACTA1      | 1 | 0.044994 | -3.48279 | -1.78012 | -3.76985 |
| PRMT8      | 1 | 0.045297 | -3.47291 | -1.78091 | -0.47505 |
| PCDH15     | 1 | 0.045436 | -3.4684  | -1.78128 | -2.69182 |
| KCTD9      | 1 | 0.045508 | -3.4661  | -1.78147 | -0.83762 |
| KCTD15     | 1 | 0.045726 | -3.45909 | -1.78204 | -1.02893 |
| TULP1      | 1 | 0.045833 | -3.45566 | -1.78232 | -0.37733 |
| CKAP4      | 1 | 0.04605  | -3.44876 | -1.78288 | -1.57442 |
| VOPP1      | 1 | 0.046244 | -3.44261 | -1.78339 | -3.45866 |
| SLC29A4    | 1 | 0.04647  | -3.43548 | -1.78398 | -0.61414 |
| KIF3A      | 1 | 0.046519 | -3.43394 | -1.7841  | -0.31212 |
| CAMK4      | 1 | 0.04656  | -3.43267 | -1.78421 | -0.50813 |
| CDC25A     | 1 | 0.0466   | -3.4314  | -1.78431 | -1.06941 |
| CACNA1C    | 1 | 0.046716 | -3.42779 | -1.78461 | -1.0372  |
| JPH2       | 1 | 0.047365 | -3.40775 | -1.78629 | -1.4123  |
| FRMD3      | 1 | 0.047751 | -3.39597 | -1.78728 | -2.90829 |
| PHOX2A     | 1 | 0.047825 | -3.39375 | -1.78747 | -0.27206 |
| PCDH7      | 1 | 0.04798  | -3.38907 | -1.78787 | -2.95681 |
| LOC500846  | 1 | 0.048125 | -3.38469 | -1.78824 | -0.37651 |
| LRRC4B     | 1 | 0.048293 | -3.37969 | -1.78867 | -0.58708 |
| SLC16A11   | 1 | 0.048892 | -3.36193 | -1.7902  | -1.35192 |
| SPTSSB     | 1 | 0.048976 | -3.35947 | -1.79041 | -0.6391  |
| SLC14A1    | 1 | 0.049022 | -3.35813 | -1.79052 | -0.25559 |
| NPEPO      | 1 | 0.049195 | -3.35306 | -1.79097 | -0.27643 |

|       |   |          |          |          |          |
|-------|---|----------|----------|----------|----------|
| DOS   | 1 | 0.049267 | -3.35097 | -1.79115 | -0.82355 |
| WNK4  | 1 | 0.049661 | -3.33956 | -1.79214 | -0.68165 |
| NCOR2 | 1 | 0.04976  | -3.33673 | -1.79239 | -0.8367  |
| H2AFX | 1 | 0.049857 | -3.33394 | -1.79264 | -0.3638  |

| day1_DEG_0.05_EvsISUp | adj.P.Val | P.Value  | t        | B        | logFC    |
|-----------------------|-----------|----------|----------|----------|----------|
| PEX11A                | 1         | 0.00032  | 22.36154 | -1.60538 | 2.569175 |
| FUK                   | 1         | 0.001668 | 12.28108 | -1.61805 | 0.897523 |
| PIM3                  | 1         | 0.001674 | 12.26359 | -1.6181  | 1.649089 |
| PLCB1                 | 1         | 0.001821 | 11.89222 | -1.61924 | 0.965183 |
| STAP1                 | 1         | 0.002036 | 11.41831 | -1.62084 | 0.835095 |
| STARD4                | 1         | 0.002318 | 10.88766 | -1.62289 | 1.178879 |
| LRP12                 | 1         | 0.002587 | 10.45804 | -1.62476 | 1.115577 |
| TIFA                  | 1         | 0.002839 | 10.1074  | -1.62647 | 0.891582 |
| CTDSPL                | 1         | 0.003071 | 9.819328 | -1.628   | 1.859168 |
| PRR5                  | 1         | 0.003078 | 9.811184 | -1.62805 | 0.959608 |
| ARPP19                | 1         | 0.003597 | 9.264468 | -1.63135 | 0.924826 |
| HES6                  | 1         | 0.003838 | 9.044867 | -1.63284 | 0.791242 |
| CHCHD10               | 1         | 0.003864 | 9.022278 | -1.63299 | 3.045128 |
| MMP11                 | 1         | 0.003917 | 8.977134 | -1.63332 | 1.722828 |
| RNLS                  | 1         | 0.004112 | 8.817452 | -1.63449 | 0.841608 |
| PCYT2                 | 1         | 0.004165 | 8.775646 | -1.63481 | 1.24628  |
| AGPS                  | 1         | 0.004273 | 8.693043 | -1.63544 | 0.647618 |
| FOXC1                 | 1         | 0.004377 | 8.615561 | -1.63606 | 0.743425 |
| UCP3                  | 1         | 0.004444 | 8.567852 | -1.63645 | 1.560339 |
| DCAF11                | 1         | 0.004693 | 8.396249 | -1.63789 | 0.725977 |
| PLCD1                 | 1         | 0.004792 | 8.33147  | -1.63846 | 0.86043  |
| OAS1K                 | 1         | 0.005153 | 8.109578 | -1.64049 | 1.661261 |
| RGD1309594            | 1         | 0.005455 | 7.939502 | -1.64216 | 0.593566 |
| TTLL3                 | 1         | 0.005484 | 7.923812 | -1.64232 | 1.101791 |
| ZCCHC2                | 1         | 0.005693 | 7.814678 | -1.64345 | 0.82862  |
| MYC                   | 1         | 0.005956 | 7.6842   | -1.64486 | 0.786543 |
| RGD1565033            | 1         | 0.005983 | 7.671226 | -1.64501 | 0.94612  |
| LOC680039             | 1         | 0.006039 | 7.644307 | -1.64531 | 0.918772 |
| NT5DC1                | 1         | 0.006083 | 7.623628 | -1.64554 | 0.559917 |
| WFDC3                 | 1         | 0.006097 | 7.617107 | -1.64562 | 7.781235 |
| NR4A1                 | 1         | 0.006494 | 7.43987  | -1.64769 | 1.608461 |
| PTGR1                 | 1         | 0.006513 | 7.431478 | -1.6478  | 0.981162 |
| LRRC29                | 1         | 0.006739 | 7.337601 | -1.64896 | 0.618371 |
| DISC1                 | 1         | 0.006748 | 7.33373  | -1.64901 | 0.953911 |
| DIXDC1                | 1         | 0.006902 | 7.272112 | -1.64979 | 0.900637 |
| WIF1                  | 1         | 0.007202 | 7.157029 | -1.65131 | 0.950579 |
| CAST                  | 1         | 0.007297 | 7.121812 | -1.65179 | 1.509397 |
| MGC108823             | 1         | 0.00752  | 7.041715 | -1.6529  | 1.257664 |
| ABCB10                | 1         | 0.007986 | 6.884573 | -1.65518 | 0.519504 |
| ECI2                  | 1         | 0.00804  | 6.86711  | -1.65544 | 2.200941 |
| PER2                  | 1         | 0.008413 | 6.750768 | -1.65724 | 0.76661  |
| LOC654482             | 1         | 0.008998 | 6.581694 | -1.66001 | 0.596335 |
| ZFP703                | 1         | 0.009046 | 6.568399 | -1.66023 | 0.944687 |
| GRTP1                 | 1         | 0.009489 | 6.45083  | -1.66228 | 0.595303 |
| WDR73                 | 1         | 0.009678 | 6.402872 | -1.66315 | 0.605887 |
| SLC25A24              | 1         | 0.009995 | 6.324986 | -1.66459 | 1.124425 |

|            |   |          |          |          |          |
|------------|---|----------|----------|----------|----------|
| FOSL2      | 1 | 0.010681 | 6.1676   | -1.66766 | 1.151925 |
| LAMA5      | 1 | 0.0108   | 6.141667 | -1.66818 | 0.492476 |
| NPTXR      | 1 | 0.01088  | 6.124398 | -1.66854 | 0.593341 |
| ABHD1      | 1 | 0.011062 | 6.085829 | -1.66934 | 0.782293 |
| AKAP7      | 1 | 0.011113 | 6.075208 | -1.66956 | 0.64775  |
| NRIP1      | 1 | 0.011334 | 6.029785 | -1.67052 | 1.418273 |
| ALKBH3     | 1 | 0.011373 | 6.021776 | -1.67069 | 0.706701 |
| CMTM7      | 1 | 0.011657 | 5.965518 | -1.67191 | 1.281167 |
| ARHGEF11   | 1 | 0.0119   | 5.918715 | -1.67296 | 0.500065 |
| NFE2L2     | 1 | 0.011901 | 5.918537 | -1.67296 | 0.894092 |
| POLDIP2    | 1 | 0.011965 | 5.906321 | -1.67323 | 0.554519 |
| SPAG8      | 1 | 0.011988 | 5.902024 | -1.67333 | 0.49843  |
| INSIG2     | 1 | 0.011999 | 5.899936 | -1.67338 | 0.768867 |
| ENPP1      | 1 | 0.012175 | 5.867176 | -1.67413 | 1.912892 |
| CARD10     | 1 | 0.01239  | 5.828004 | -1.67504 | 1.280126 |
| SERINC1    | 1 | 0.012539 | 5.801476 | -1.67566 | 0.661868 |
| GTPBP10    | 1 | 0.013144 | 5.697539 | -1.67818 | 0.607685 |
| PQLC1      | 1 | 0.013148 | 5.696897 | -1.6782  | 0.878242 |
| LOC302022  | 1 | 0.013178 | 5.691964 | -1.67832 | 0.910464 |
| LURAP1L    | 1 | 0.013501 | 5.6392   | -1.67965 | 1.031282 |
| ST7L       | 1 | 0.013567 | 5.628657 | -1.67992 | 0.456945 |
| PTPRG      | 1 | 0.013654 | 5.614861 | -1.68027 | 0.934377 |
| CCDC51     | 1 | 0.01383  | 5.587237 | -1.68099 | 0.480587 |
| ANPEP      | 1 | 0.013873 | 5.580649 | -1.68116 | 3.150449 |
| SBF2       | 1 | 0.013982 | 5.563801 | -1.68161 | 0.907114 |
| AGPAT3     | 1 | 0.014041 | 5.554749 | -1.68185 | 1.53872  |
| RAD51D     | 1 | 0.014163 | 5.536287 | -1.68234 | 0.803961 |
| LUZP1      | 1 | 0.014165 | 5.536043 | -1.68234 | 0.882199 |
| CRTC2      | 1 | 0.014276 | 5.519384 | -1.68279 | 0.5065   |
| PTGER1     | 1 | 0.014402 | 5.500677 | -1.6833  | 0.63451  |
| EBPL       | 1 | 0.014664 | 5.462543 | -1.68435 | 1.719937 |
| FBXL4      | 1 | 0.015713 | 5.318574 | -1.68847 | 0.563483 |
| ELP6       | 1 | 0.015814 | 5.305429 | -1.68887 | 0.599879 |
| EXTL3      | 1 | 0.016406 | 5.230382 | -1.69115 | 1.200432 |
| NCKIPSD    | 1 | 0.016842 | 5.177346 | -1.69281 | 0.487862 |
| RGD1308117 | 1 | 0.016846 | 5.176861 | -1.69283 | 0.484693 |
| PIGW       | 1 | 0.016879 | 5.172953 | -1.69295 | 0.725018 |
| MEGF6      | 1 | 0.016891 | 5.17154  | -1.693   | 0.828567 |
| SRSF9      | 1 | 0.017104 | 5.146308 | -1.6938  | 0.50918  |
| URB1       | 1 | 0.017161 | 5.139719 | -1.69402 | 0.989441 |
| TRAF6      | 1 | 0.017207 | 5.134316 | -1.69419 | 0.407404 |
| NCOA5      | 1 | 0.017704 | 5.077652 | -1.69606 | 0.384591 |
| PIEZO1     | 1 | 0.017838 | 5.062781 | -1.69656 | 1.625296 |
| RPAIN      | 1 | 0.017877 | 5.058495 | -1.6967  | 0.844212 |
| BICD1      | 1 | 0.018111 | 5.032863 | -1.69757 | 1.4223   |
| RGD1304810 | 1 | 0.018601 | 4.980597 | -1.69938 | 0.736199 |
| ECHDC3     | 1 | 0.018638 | 4.976734 | -1.69951 | 2.044652 |

|         |   |          |          |          |          |
|---------|---|----------|----------|----------|----------|
| EMC3    | 1 | 0.018666 | 4.973826 | -1.69961 | 0.858354 |
| ZFP955A | 1 | 0.018908 | 4.948876 | -1.7005  | 0.859069 |
| NT5M    | 1 | 0.019603 | 4.87928  | -1.70302 | 0.727443 |
| TEX38   | 1 | 0.019741 | 4.865867 | -1.70351 | 0.527157 |
| ASRGL1  | 1 | 0.019788 | 4.861396 | -1.70368 | 2.103474 |
| SMPDL3A | 1 | 0.019912 | 4.849474 | -1.70413 | 2.76503  |
| CARHSP1 | 1 | 0.020179 | 4.824172 | -1.70508 | 0.88502  |
| FDX1    | 1 | 0.020276 | 4.815018 | -1.70543 | 0.86263  |
| HMGCS1  | 1 | 0.020412 | 4.802373 | -1.70591 | 1.888074 |
| ECI3    | 1 | 0.020458 | 4.798182 | -1.70607 | 1.248107 |
| MFSD7   | 1 | 0.020542 | 4.790399 | -1.70637 | 0.398408 |
| KCNH2   | 1 | 0.020639 | 4.781579 | -1.70671 | 0.826441 |
| LRRC28  | 1 | 0.020653 | 4.780234 | -1.70677 | 0.459229 |
| KCNS1   | 1 | 0.020664 | 4.779284 | -1.7068  | 0.72758  |
| TAF9B   | 1 | 0.020709 | 4.775176 | -1.70696 | 0.812241 |
| CECR5   | 1 | 0.021009 | 4.748156 | -1.70802 | 0.408521 |
| MRPL50  | 1 | 0.021043 | 4.745198 | -1.70814 | 0.487021 |
| UGT2B10 | 1 | 0.021048 | 4.744735 | -1.70816 | 2.054304 |
| ALG11   | 1 | 0.021219 | 4.729576 | -1.70876 | 0.905095 |
| STK10   | 1 | 0.02157  | 4.699055 | -1.70998 | 0.931501 |
| GNMT    | 1 | 0.021611 | 4.695521 | -1.71013 | 0.703978 |
| CARD9   | 1 | 0.021704 | 4.687568 | -1.71045 | 0.507409 |
| TSC22D3 | 1 | 0.021722 | 4.686058 | -1.71051 | 0.977778 |
| MPZL2   | 1 | 0.021908 | 4.670274 | -1.71116 | 0.824041 |
| SEMA3F  | 1 | 0.022003 | 4.662338 | -1.71148 | 0.685207 |
| PTPMT1  | 1 | 0.02206  | 4.657563 | -1.71168 | 0.990786 |
| CSNK1G3 | 1 | 0.022093 | 4.654772 | -1.7118  | 0.355198 |
| TIMP4   | 1 | 0.023011 | 4.580309 | -1.71494 | 2.772055 |
| NDNL2   | 1 | 0.02311  | 4.572521 | -1.71528 | 2.091925 |
| CYB5R1  | 1 | 0.023134 | 4.570637 | -1.71536 | 0.764359 |
| TMEM237 | 1 | 0.023367 | 4.552472 | -1.71615 | 0.517935 |
| MRPL55  | 1 | 0.023374 | 4.551982 | -1.71617 | 0.720164 |
| PM20D2  | 1 | 0.023628 | 4.532467 | -1.71703 | 1.225746 |
| GADD45A | 1 | 0.023708 | 4.526395 | -1.7173  | 1.823194 |
| DHRS1   | 1 | 0.023776 | 4.521205 | -1.71753 | 0.993344 |
| PEX6    | 1 | 0.023829 | 4.517225 | -1.7177  | 0.881454 |
| MAFG    | 1 | 0.023865 | 4.5145   | -1.71783 | 0.498646 |
| ARHGAP9 | 1 | 0.023904 | 4.511559 | -1.71796 | 0.771471 |
| FAM151B | 1 | 0.023978 | 4.505991 | -1.71821 | 0.673565 |
| MGST3   | 1 | 0.023997 | 4.504624 | -1.71827 | 1.197662 |
| PITPNM2 | 1 | 0.024067 | 4.499399 | -1.7185  | 1.135897 |
| POPDC3  | 1 | 0.024144 | 4.493675 | -1.71876 | 2.176693 |
| SNCAIP  | 1 | 0.024226 | 4.487564 | -1.71904 | 0.726095 |
| RBM47   | 1 | 0.02428  | 4.483657 | -1.71921 | 0.791802 |
| LTBP3   | 1 | 0.024289 | 4.482958 | -1.71924 | 0.89254  |
| HINT3   | 1 | 0.024916 | 4.437647 | -1.72133 | 0.50714  |
| CLTB    | 1 | 0.025846 | 4.373089 | -1.72438 | 1.03537  |

|            |   |          |          |          |          |
|------------|---|----------|----------|----------|----------|
| TINF2      | 1 | 0.02586  | 4.372199 | -1.72442 | 0.511847 |
| AHCYL2     | 1 | 0.025905 | 4.369149 | -1.72457 | 1.965723 |
| ABCD3      | 1 | 0.025957 | 4.365618 | -1.72474 | 0.585689 |
| RANBP6     | 1 | 0.025972 | 4.364594 | -1.72479 | 0.409975 |
| TMEM60     | 1 | 0.026029 | 4.360772 | -1.72498 | 0.470397 |
| THRB       | 1 | 0.026372 | 4.337967 | -1.72609 | 1.555843 |
| SLC26A6    | 1 | 0.026411 | 4.335432 | -1.72621 | 0.735687 |
| HDAC10     | 1 | 0.026673 | 4.318286 | -1.72706 | 0.519258 |
| USP18      | 1 | 0.026699 | 4.316614 | -1.72714 | 0.871196 |
| DHRS7B     | 1 | 0.026969 | 4.29918  | -1.72801 | 0.669005 |
| NSD1       | 1 | 0.027169 | 4.286468 | -1.72865 | 0.465796 |
| ABHD16A    | 1 | 0.027284 | 4.279201 | -1.72902 | 0.866858 |
| ZFP36      | 1 | 0.027302 | 4.278023 | -1.72908 | 0.942597 |
| RDH7       | 1 | 0.027341 | 4.275575 | -1.7292  | 1.081255 |
| GPATCH2L   | 1 | 0.027361 | 4.274307 | -1.72927 | 0.313706 |
| HRSP12     | 1 | 0.027682 | 4.254312 | -1.73029 | 0.995548 |
| BTBD6      | 1 | 0.027846 | 4.244202 | -1.73081 | 0.671724 |
| AFAP1L1    | 1 | 0.027856 | 4.243624 | -1.73084 | 1.057666 |
| PALB2      | 1 | 0.028012 | 4.234077 | -1.73134 | 0.33366  |
| PHF21B     | 1 | 0.028118 | 4.227598 | -1.73167 | 0.380312 |
| PRMT7      | 1 | 0.028638 | 4.196493 | -1.73331 | 0.417618 |
| ARID5A     | 1 | 0.029023 | 4.173907 | -1.73452 | 0.398091 |
| CYTH2      | 1 | 0.029127 | 4.167865 | -1.73484 | 0.761425 |
| MRPL49     | 1 | 0.029523 | 4.145165 | -1.73607 | 0.537846 |
| LOC501110  | 1 | 0.029763 | 4.13164  | -1.73681 | 0.765271 |
| MSH3       | 1 | 0.029858 | 4.126299 | -1.73711 | 1.083087 |
| CCDC17     | 1 | 0.029879 | 4.125141 | -1.73717 | 0.779072 |
| MYO5A      | 1 | 0.029897 | 4.124122 | -1.73723 | 0.846896 |
| RGD1304694 | 1 | 0.030339 | 4.099636 | -1.73859 | 0.381025 |
| PREB       | 1 | 0.030473 | 4.092305 | -1.739   | 0.321366 |
| MAPRE2     | 1 | 0.030501 | 4.09079  | -1.73909 | 1.225086 |
| PDLIM2     | 1 | 0.030809 | 4.074126 | -1.74003 | 0.655643 |
| SETMAR     | 1 | 0.030913 | 4.068547 | -1.74035 | 0.299776 |
| DIS3L      | 1 | 0.030932 | 4.067542 | -1.74041 | 0.721669 |
| ZFP978     | 1 | 0.031046 | 4.061449 | -1.74075 | 0.392364 |
| LRRC71     | 1 | 0.031115 | 4.057805 | -1.74096 | 0.442867 |
| ATP6V1G3   | 1 | 0.031308 | 4.047601 | -1.74155 | 0.871544 |
| RNF4       | 1 | 0.031384 | 4.043634 | -1.74178 | 0.338287 |
| ARRDC2     | 1 | 0.031447 | 4.040329 | -1.74197 | 0.533401 |
| FAM89B     | 1 | 0.031591 | 4.032828 | -1.74241 | 0.806604 |
| YTHDC1     | 1 | 0.031681 | 4.02814  | -1.74268 | 0.317693 |
| TMEM116    | 1 | 0.031866 | 4.018583 | -1.74324 | 0.741704 |
| S100A10    | 1 | 0.032535 | 3.984668 | -1.74525 | 1.258882 |
| ZC4H2      | 1 | 0.032608 | 3.981026 | -1.74547 | 0.351847 |
| ELOVL7     | 1 | 0.032621 | 3.980421 | -1.7455  | 3.875952 |
| WDR45B     | 1 | 0.032666 | 3.97814  | -1.74564 | 0.50131  |
| EMB        | 1 | 0.033035 | 3.959914 | -1.74674 | 1.804961 |

|              |   |          |          |          |          |
|--------------|---|----------|----------|----------|----------|
| RRAGD        | 1 | 0.033287 | 3.947653 | -1.74748 | 0.840171 |
| FAM175A      | 1 | 0.033375 | 3.943393 | -1.74774 | 0.646814 |
| GRSF1        | 1 | 0.033502 | 3.937258 | -1.74812 | 0.459053 |
| MAK16        | 1 | 0.033549 | 3.93498  | -1.74826 | 0.364495 |
| PHF8         | 1 | 0.033638 | 3.930731 | -1.74852 | 0.485344 |
| POMGNT2      | 1 | 0.033845 | 3.920866 | -1.74913 | 0.45756  |
| RNF130       | 1 | 0.033971 | 3.914906 | -1.7495  | 0.689645 |
| SERINC3      | 1 | 0.034042 | 3.911527 | -1.74971 | 0.784218 |
| LOC690617    | 1 | 0.03409  | 3.909285 | -1.74985 | 1.353091 |
| PROS1        | 1 | 0.034169 | 3.905585 | -1.75009 | 1.438862 |
| TMCO1        | 1 | 0.034221 | 3.903119 | -1.75024 | 0.980438 |
| CERS2        | 1 | 0.034236 | 3.902456 | -1.75028 | 1.048464 |
| RNF135       | 1 | 0.03428  | 3.900362 | -1.75041 | 0.414502 |
| DEF8         | 1 | 0.034607 | 3.885225 | -1.75137 | 0.943578 |
| DRAM2        | 1 | 0.034793 | 3.876673 | -1.75191 | 1.517106 |
| ARSE         | 1 | 0.03487  | 3.87313  | -1.75214 | 0.745065 |
| DNAJC4       | 1 | 0.034894 | 3.872031 | -1.75221 | 0.42782  |
| SIX1         | 1 | 0.035504 | 3.844521 | -1.75398 | 1.28413  |
| ADIPOR2      | 1 | 0.035689 | 3.836319 | -1.75451 | 1.450015 |
| LOC100363521 | 1 | 0.035735 | 3.834274 | -1.75464 | 0.625689 |
| BMI1         | 1 | 0.035783 | 3.832153 | -1.75478 | 0.454732 |
| PLK3         | 1 | 0.035831 | 3.830036 | -1.75492 | 1.07545  |
| ZBED5        | 1 | 0.035881 | 3.827822 | -1.75506 | 0.769806 |
| IKZF5        | 1 | 0.035976 | 3.823681 | -1.75534 | 0.589024 |
| DDRGK1       | 1 | 0.036246 | 3.811885 | -1.75611 | 0.724571 |
| CYB561D1     | 1 | 0.036313 | 3.808986 | -1.7563  | 0.311469 |
| PWWP2B       | 1 | 0.036371 | 3.806472 | -1.75647 | 1.826014 |
| S100A1       | 1 | 0.036387 | 3.805784 | -1.75652 | 0.972054 |
| ACACB        | 1 | 0.036391 | 3.805622 | -1.75653 | 2.621249 |
| ZFP592       | 1 | 0.036426 | 3.80408  | -1.75663 | 0.285017 |
| CEP89        | 1 | 0.036433 | 3.803805 | -1.75665 | 0.343642 |
| SYCE2        | 1 | 0.036443 | 3.803385 | -1.75668 | 0.476971 |
| NEK7         | 1 | 0.036903 | 3.783689 | -1.75799 | 1.274995 |
| FBXO36       | 1 | 0.036956 | 3.781466 | -1.75814 | 0.601303 |
| LYPLA1       | 1 | 0.036971 | 3.780827 | -1.75818 | 0.908707 |
| PPP1R15B     | 1 | 0.0372   | 3.771195 | -1.75883 | 0.467815 |
| PARP6        | 1 | 0.037237 | 3.769607 | -1.75894 | 0.290361 |
| SLC25A32     | 1 | 0.037351 | 3.764859 | -1.75926 | 0.797208 |
| CEP131       | 1 | 0.037364 | 3.76432  | -1.7593  | 0.276265 |
| VRK3         | 1 | 0.037488 | 3.759151 | -1.75965 | 0.803074 |
| ATP6V0D2     | 1 | 0.037953 | 3.739996 | -1.76096 | 0.291762 |
| KLHL7        | 1 | 0.0381   | 3.733989 | -1.76138 | 1.056873 |
| RAMP3        | 1 | 0.038263 | 3.727402 | -1.76184 | 0.291577 |
| STAG1        | 1 | 0.038636 | 3.712407 | -1.76288 | 0.379977 |
| ARHGAP22     | 1 | 0.03889  | 3.70233  | -1.76359 | 0.349868 |
| ABHD13       | 1 | 0.039101 | 3.693991 | -1.76418 | 0.792326 |
| MED8         | 1 | 0.039127 | 3.692962 | -1.76425 | 0.671656 |

|              |   |          |          |          |          |
|--------------|---|----------|----------|----------|----------|
| PRDX1        | 1 | 0.039457 | 3.680075 | -1.76517 | 0.977967 |
| WHAMM        | 1 | 0.039481 | 3.679165 | -1.76523 | 0.706688 |
| PCGF3        | 1 | 0.03949  | 3.678811 | -1.76526 | 0.420347 |
| RNASE6       | 1 | 0.039546 | 3.676641 | -1.76541 | 0.333258 |
| RILPL2       | 1 | 0.039614 | 3.67401  | -1.7656  | 0.37486  |
| NT5C         | 1 | 0.039834 | 3.665521 | -1.76621 | 0.401811 |
| HOGA1        | 1 | 0.039953 | 3.660975 | -1.76654 | 1.610464 |
| SLC25A11     | 1 | 0.040068 | 3.656593 | -1.76686 | 0.741209 |
| SLC39A13     | 1 | 0.040524 | 3.639359 | -1.76811 | 0.83009  |
| MBOAT2       | 1 | 0.040693 | 3.633027 | -1.76857 | 2.933379 |
| ZFP612       | 1 | 0.040823 | 3.6282   | -1.76893 | 0.566392 |
| RGD1566099   | 1 | 0.041837 | 3.591107 | -1.77169 | 0.46767  |
| ARL6IP6      | 1 | 0.0421   | 3.581695 | -1.7724  | 0.671546 |
| ALG8         | 1 | 0.042307 | 3.574327 | -1.77296 | 0.617293 |
| ABCB8        | 1 | 0.042593 | 3.564233 | -1.77373 | 0.879004 |
| NDUFS4       | 1 | 0.042869 | 3.55456  | -1.77447 | 0.802764 |
| PDZK1        | 1 | 0.042918 | 3.552853 | -1.77461 | 0.27116  |
| MCM6         | 1 | 0.043341 | 3.538234 | -1.77574 | 0.420856 |
| KLHL12       | 1 | 0.043391 | 3.536519 | -1.77587 | 0.493671 |
| LOC100909680 | 1 | 0.043612 | 3.52896  | -1.77646 | 1.60004  |
| NAP1L1       | 1 | 0.043715 | 3.525454 | -1.77673 | 1.197685 |
| FAM213A      | 1 | 0.043829 | 3.521577 | -1.77704 | 0.903537 |
| CRLF2        | 1 | 0.044047 | 3.514211 | -1.77762 | 0.737199 |
| SEC61A2      | 1 | 0.04437  | 3.503387 | -1.77847 | 0.372645 |
| TOMM34       | 1 | 0.044433 | 3.501308 | -1.77864 | 0.43105  |
| CTU2         | 1 | 0.044492 | 3.499333 | -1.7788  | 0.260801 |
| PRKRIR       | 1 | 0.044605 | 3.495585 | -1.77909 | 0.438728 |
| PPP5C        | 1 | 0.044715 | 3.491963 | -1.77938 | 0.31452  |
| SLC46A3      | 1 | 0.044891 | 3.486153 | -1.77985 | 1.179032 |
| CSGALNACT2   | 1 | 0.044988 | 3.482993 | -1.7801  | 0.391852 |
| P2RX6        | 1 | 0.045074 | 3.48016  | -1.78033 | 0.887321 |
| DHFR         | 1 | 0.045255 | 3.47429  | -1.7808  | 0.421444 |
| HPCAL1       | 1 | 0.046076 | 3.447911 | -1.78295 | 0.8643   |
| DCAF4        | 1 | 0.046251 | 3.442363 | -1.78341 | 0.524986 |
| ADAM15       | 1 | 0.046367 | 3.438727 | -1.78371 | 0.878202 |
| PLEKHF1      | 1 | 0.046568 | 3.432407 | -1.78423 | 0.955707 |
| ID4          | 1 | 0.046616 | 3.430898 | -1.78435 | 2.561788 |
| NRBF2        | 1 | 0.046731 | 3.427308 | -1.78465 | 0.263156 |
| MME          | 1 | 0.046926 | 3.421247 | -1.78516 | 3.407933 |
| DALRD3       | 1 | 0.046999 | 3.419003 | -1.78534 | 0.278742 |
| CROT         | 1 | 0.047074 | 3.416674 | -1.78554 | 1.693569 |
| AMMECR1L     | 1 | 0.047234 | 3.41175  | -1.78595 | 0.3347   |
| GNPAT        | 1 | 0.047749 | 3.396053 | -1.78727 | 1.368851 |
| HSF2         | 1 | 0.047821 | 3.393848 | -1.78746 | 0.322628 |
| ELOVL4       | 1 | 0.048007 | 3.388238 | -1.78794 | 1.038888 |
| SPATA25      | 1 | 0.048433 | 3.375518 | -1.78903 | 0.588936 |
| NDUFV3       | 1 | 0.048516 | 3.373025 | -1.78924 | 0.990774 |

|          |   |          |          |          |          |
|----------|---|----------|----------|----------|----------|
| ZFP251   | 1 | 0.048881 | 3.36227  | -1.79017 | 0.312943 |
| AIFM1    | 1 | 0.049114 | 3.355444 | -1.79076 | 0.761213 |
| KCTD19   | 1 | 0.049378 | 3.347747 | -1.79143 | 0.256275 |
| ARHGAP35 | 1 | 0.049563 | 3.342375 | -1.7919  | 0.638093 |
| ITGB1BP1 | 1 | 0.049606 | 3.341139 | -1.79201 | 0.444004 |
| TUBGCP6  | 1 | 0.049727 | 3.337675 | -1.79231 | 0.319526 |
| DAGLB    | 1 | 0.049881 | 3.333237 | -1.7927  | 0.642014 |
