# Supplementary material
Source: PubMed Central journal article supplement (PMC6684261)
Supplement: NIHMS1530297-supplement-Supp_figs.pdf [file NIHMS1530297-supplement-Supp_figs.pdf]

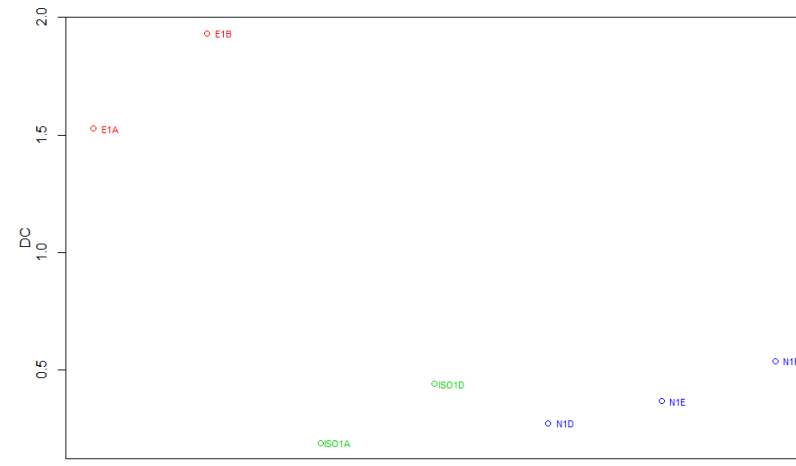

E vs ISO | (limma)p=0.00615

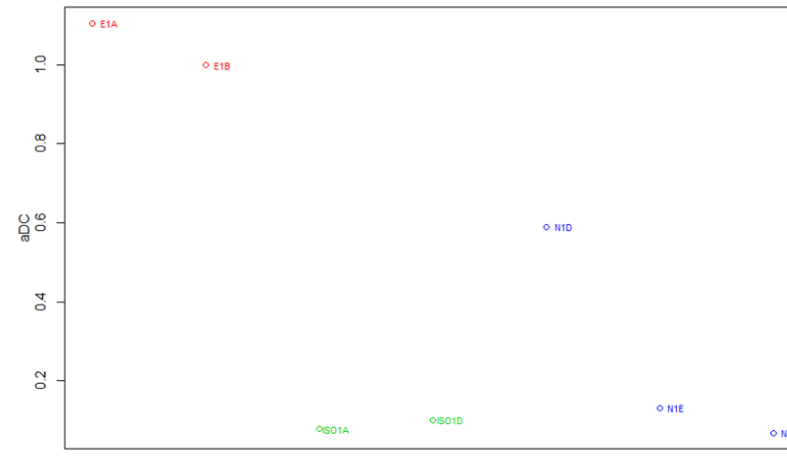

E vs ISO | (limma)p=0.01555

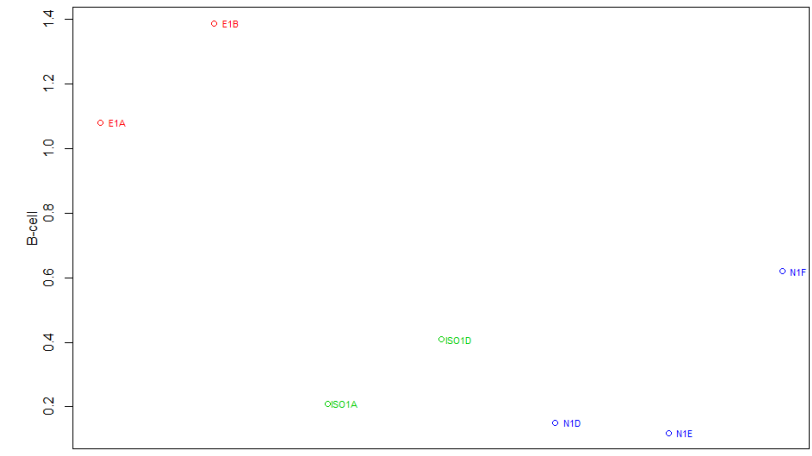

E vs ISO | (limma)p=0.02451

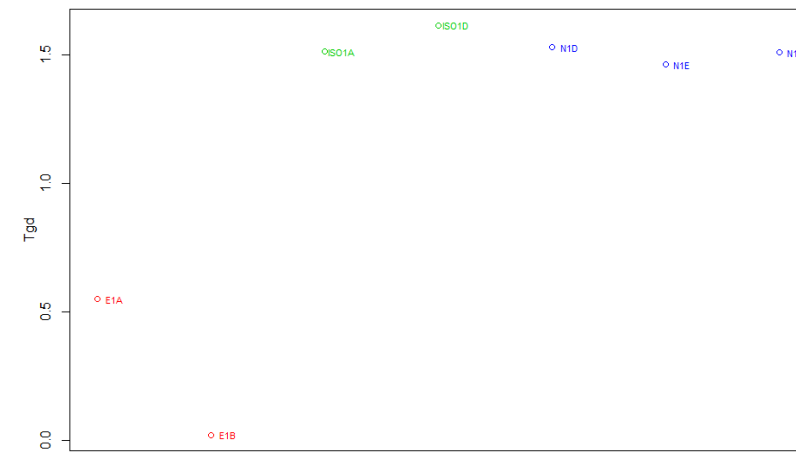

E vs ISO | (limma)p=0.01051

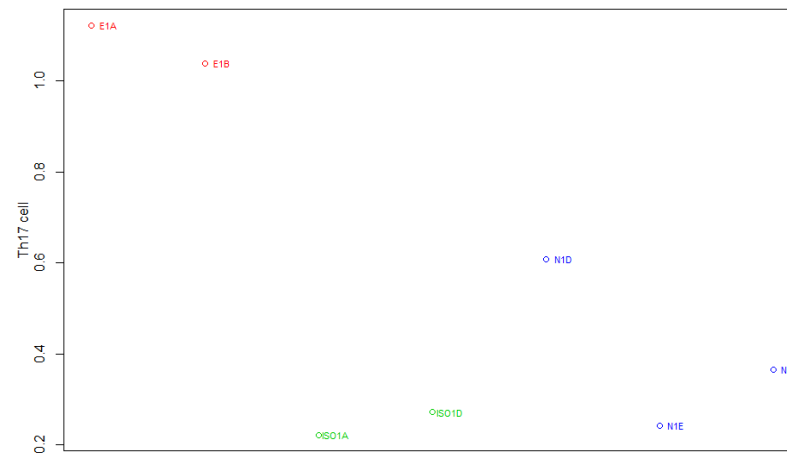

E vs ISO | (limma)p=0.02577

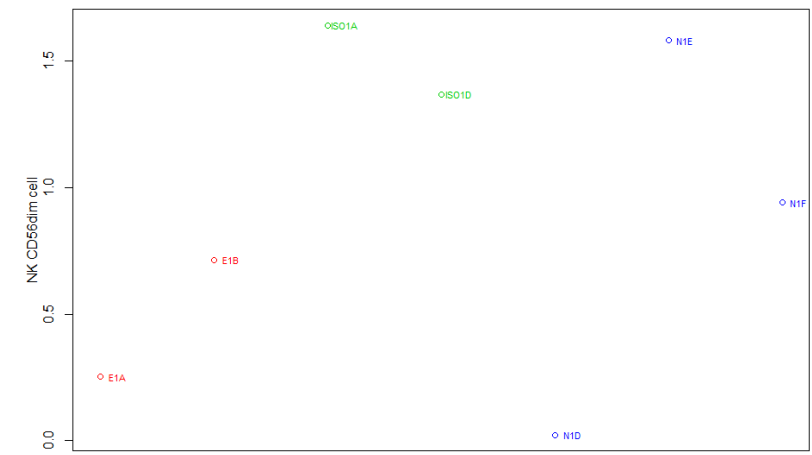

E vs ISO | (limma)p=0.02382

Supplemental Figure 2. Cell type enrichment analysis results of significantly changed immune cell types at 1 day post dust exposure, using ISO group as controls.

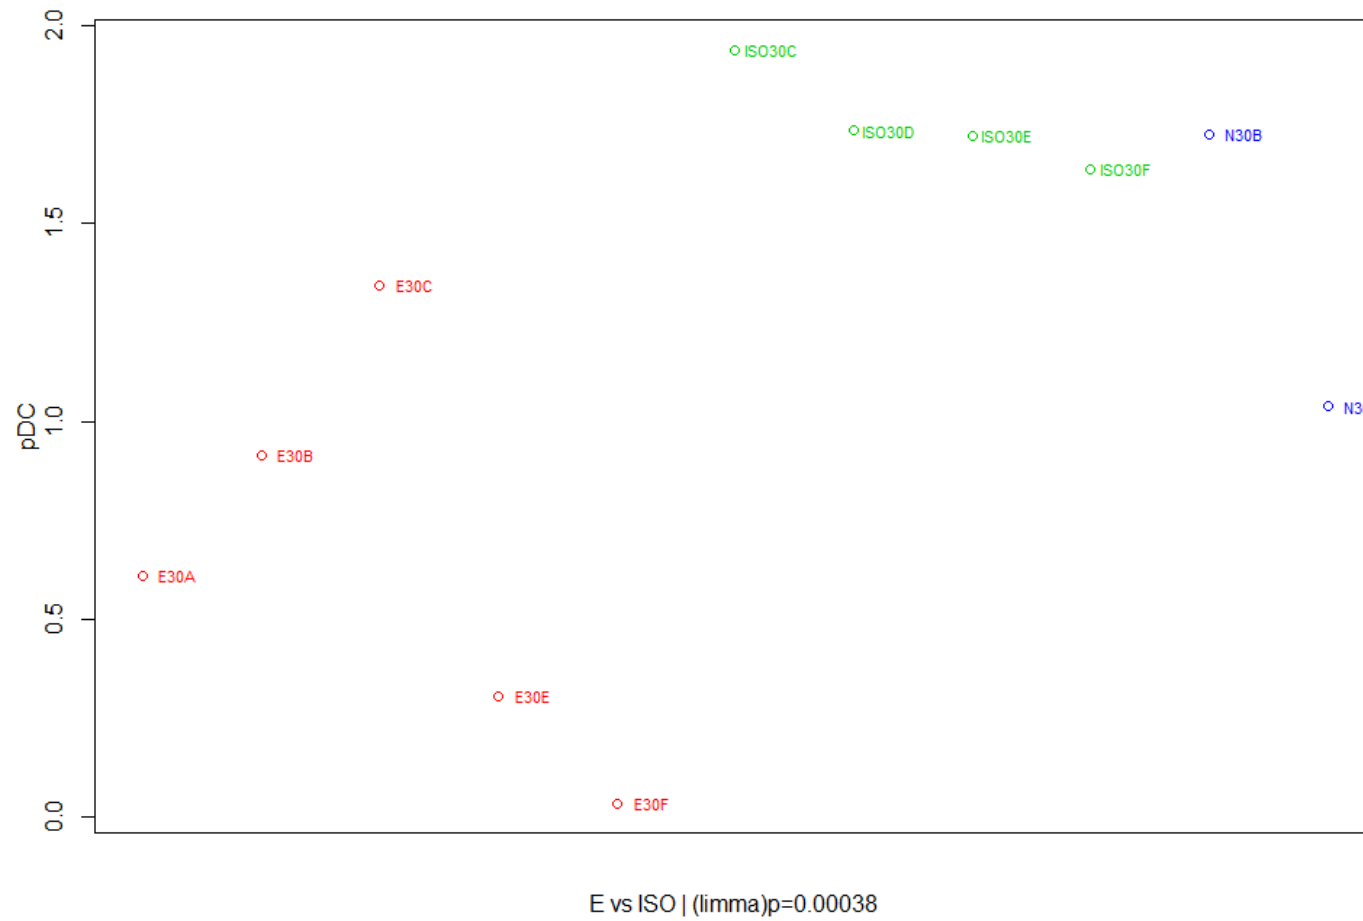

Supplemental Figure 3. Cell type enrichment analysis results of significantly changed immune cell types at 1 day post dust exposure, using ISO group as controls.
